# Supplementary material for: Emotional distress and well-being among people with motor neurone disease (MND) and their family caregivers: a qualitative interview study
Source: PubMed Central journal article supplement (PMC8372816; doi:10.1136/bmjopen-2020-044724), 2021-08-16
Supplement: bmjopen-2020-044724.draft_revisions.pdf [file bmjopen-2020-044724.draft_revisions.pdf]

# BMJ Open

BMJ Open is committed to open peer review. As part of this commitment we make the peer review history of every article we publish publicly available.

When an article is published we post the peer reviewers' comments and the authors' responses online. We also post the versions of the paper that were used during peer review. These are the versions that the peer review comments apply to.

The versions of the paper that follow are the versions that were submitted during the peer review process. They are not the versions of record or the final published versions. They should not be cited or distributed as the published version of this manuscript.

BMJ Open is an open access journal and the full, final, typeset and author-corrected version of record of the manuscript is available on our site with no access controls, subscription charges or pay-per-view fees (<http://bmjopen.bmj.com>).

If you have any questions on BMJ Open's open peer review process please email [info.bmjopen@bmj.com](mailto:info.bmjopen@bmj.com)

# BMJ Open

## Emotional distress and wellbeing among people with Motor Neurone Disease (MND) and their family caregivers: a qualitative study

|                               |                                                                                                                                                                                                                                                                                                  |
|-------------------------------|--------------------------------------------------------------------------------------------------------------------------------------------------------------------------------------------------------------------------------------------------------------------------------------------------|
| Journal:                      | <i>BMJ Open</i>                                                                                                                                                                                                                                                                                  |
| Manuscript ID                 | bmjopen-2020-044724                                                                                                                                                                                                                                                                              |
| Article Type:                 | Original research                                                                                                                                                                                                                                                                                |
| Date Submitted by the Author: | 12-Sep-2020                                                                                                                                                                                                                                                                                      |
| Complete List of Authors:     | Pinto, Cathryn; University of Southampton, Psychology<br>Geraghty, Adam; University of Southampton, Primary Care and Population Sciences<br>Yardley, Lucy; University of Southampton, Psychology; University of Bristol, School of Health Sciences<br>Dennison, Laura; University of Southampton |
| Keywords:                     | Motor neurone disease < NEUROLOGY, Depression & mood disorders < PSYCHIATRY, Anxiety disorders < PSYCHIATRY, QUALITATIVE RESEARCH                                                                                                                                                                |
|                               |                                                                                                                                                                                                                                                                                                  |

SCHOLARONE™  
Manuscripts

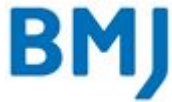

I, the Submitting Author has the right to grant and does grant on behalf of all authors of the Work (as defined in the below author licence), an exclusive licence and/or a non-exclusive licence for contributions from authors who are: i) UK Crown employees; ii) where BMJ has agreed a CC-BY licence shall apply, and/or iii) in accordance with the terms applicable for US Federal Government officers or employees acting as part of their official duties; on a worldwide, perpetual, irrevocable, royalty-free basis to BMJ Publishing Group Ltd ("BMJ") its licensees and where the relevant Journal is co-owned by BMJ to the co-owners of the Journal, to publish the Work in this journal and any other BMJ products and to exploit all rights, as set out in our [licence](#).

The Submitting Author accepts and understands that any supply made under these terms is made by BMJ to the Submitting Author unless you are acting as an employee on behalf of your employer or a postgraduate student of an affiliated institution which is paying any applicable article publishing charge ("APC") for Open Access articles. Where the Submitting Author wishes to make the Work available on an Open Access basis (and intends to pay the relevant APC), the terms of reuse of such Open Access shall be governed by a Creative Commons licence – details of these licences and which [Creative Commons](#) licence will apply to this Work are set out in our licence referred to above.

Other than as permitted in any relevant BMJ Author's Self Archiving Policies, I confirm this Work has not been accepted for publication elsewhere, is not being considered for publication elsewhere and does not duplicate material already published. I confirm all authors consent to publication of this Work and authorise the granting of this licence.

1  
2  
3 **Emotional distress and wellbeing among people with Motor Neurone**  
4 **Disease (MND) and their family caregivers: a qualitative study**  
5  
6  
7

8  
9 Cathryn Pinto,<sup>a\*</sup> Adam W A Geraghty<sup>b</sup>, Lucy Yardley<sup>a,c</sup> and Laura Dennison<sup>a</sup>  
10  
11  
12  
13  
14  
15

16 *<sup>a</sup>Department of psychology, University of Southampton, Southampton, UK;*  
17  
18

19 *<sup>b</sup>Primary care, population sciences and medical education, University of Southampton,*  
20 *Southampton, UK;*  
21  
22  
23

24 *<sup>c</sup>School of psychological science, University of Bristol, Bristol, UK*  
25  
26  
27

28 \*Corresponding author: Cathryn Pinto, University of Southampton, B44 Highfield campus,  
29 Southampton SO17 1BJ Email: [C.L.Pinto@soton.ac.uk](mailto:C.L.Pinto@soton.ac.uk)  
30  
31  
32  
33  
34  
35  
36  
37  
38  
39

40 Word count: 3,876  
41  
42  
43  
44  
45  
46  
47  
48  
49  
50  
51  
52  
53  
54  
55  
56  
57  
58  
59  
60

## Abstract

**Objective:** We aimed to get an in-depth understanding of the emotions experienced by people with MND and their caregivers and to explore what impacts emotional distress and wellbeing.

**Design:** Qualitative study using semi-structured interviews with people with MND and caregivers.

**Setting:** Participants were recruited from across the UK and took part in interviews conducted either face-to-face, by telephone or email to accommodate for varying levels of disability.

**Participants:** 25 people with MND and 10 caregivers took part. Participants were purposively sampled based on their MND diagnosis, symptoms and time since diagnosis.

**Data analysis:** Data were analysed using inductive reflexive thematic analysis.

**Results:** Eight broad themes were generated (20 subthemes). Participants described the emotional distress of losing physical function and having a threatened future because of poor prognosis. Keeping up with constant changes in symptoms and feeling unsupported by the healthcare system added to emotional distress. Finding hope and positivity, exerting some control, being kinder to oneself, and experiencing support from others were helpful strategies for emotional wellbeing.

**Conclusion:** We provide an in-depth understanding of what impacts emotional distress and wellbeing and discuss implications for psychological interventions for people with MND and their family. Any communication and support provided for people with MND and their caregivers, needs to pay attention to concepts of hope, control, and compassion.

1  
2  
3 Keywords: Motor neuron disease; emotional distress; wellbeing; depression; qualitative  
4  
5 research  
6  
7  
8  
9  
10  
11

12 **Article summary (Strengths and Limitations):**  
13

- 14 • This study focuses on the experience of emotions in people with MND and their  
15 caregivers and provides an in-depth account of what impacts emotional distress and  
16 wellbeing.  
17  
18  
19  
20
- 21 • Purposive sampling and flexible recruitment strategies used to capture experiences of  
22 emotional distress and wellbeing from people with MND with various symptoms and  
23 at differing lengths of time since diagnosis.  
24  
25  
26  
27
- 28 • Findings did not represent the experiences of people with mild cognitive impairment,  
29 who were underrepresented in the sample.  
30  
31  
32  
33  
34  
35  
36  
37  
38  
39  
40  
41  
42  
43  
44  
45  
46  
47  
48  
49  
50  
51  
52  
53  
54  
55  
56  
57  
58  
59  
60

## INTRODUCTION

Motor neurone disease (MND) is a neurodegenerative disease, which results in declining physical function and has a very poor prognosis.(1) People with MND (pwMND) also experience a range of psychological symptoms. Many pwMND experience depression.(2-4) Anxiety is prevalent around the time of diagnosis(5, 6) and during the final stages.(7) PwMND also experience other forms of emotional distress besides anxiety and depression including feelings of hopelessness(8-10) and demoralization.(2) Emotions are also affected by low self-esteem,(4, 11) end of life concerns,(8) faith/existential concerns,(12, 13) sense of loss,(13, 14) and changes in identity, roles and relationships.(11, 13, 15) Qualitative research on experiences of living with MND has also described the impact of the significant losses that come with MND on personal, social and occupational relationships.(10) Family members or caregivers of pwMND often struggle with the emotional impact and burden of the disease, and have high rates of psychological morbidity.(16-18) Qualitative studies with caregivers have described the strain from caring tasks, from having to make changes to their own lives and not having time for themselves.(19-21) In terms of wellbeing, psychosocial factors like coping strategies and social support, are more strongly related to wellbeing and quality of life than demographic and clinical factors.(11, 22, 23)

There have however, been few effective psychological interventions to improve psychological wellbeing,(24) and more research and interventions are needed.(17) An in-depth understanding of the emotions experienced, factors that trigger emotional distress, ways in which people cope with emotional distress and improve wellbeing would help inform future psychological interventions.

Qualitative research with pwMND and their caregivers can provide such information. Few qualitative studies have specifically examined emotional distress and wellbeing in MND and

1  
2  
3 potential factors that may impact distress or wellbeing. One study examined the use of  
4 metaphors to express emotions,(25) and a small number have focused on emotions at specific  
5 time periods (e.g. during diagnosis or the final stages).(6, 14, 26) It is also important to  
6 understand the experiences of emotions and coping among people whose experiences are not  
7 yet well represented in research, especially people with speech difficulties, cognitive  
8 impairment, and people at different stages of the disease.  
9  
10  
11  
12  
13  
14  
15  
16  
17

18 Our aim is to understand the emotional impact of living with MND and to explore what  
19 impacts experiences of emotional distress and wellbeing among pwMND and their family  
20 caregivers.  
21  
22  
23  
24  
25  
26  
27  
28  
29  
30  
31  
32  
33  
34  
35  
36  
37  
38  
39  
40  
41  
42  
43  
44  
45  
46  
47  
48  
49  
50  
51  
52  
53  
54  
55  
56  
57  
58  
59  
60



## METHODS

### Design

Qualitative study using in-depth semi-structured interviews, reported in accordance with the Consolidated criteria for reporting qualitative research (COREQ) (see Supplementary file 2).(27)

### Participants

Participants were 25 pwMND and 10 family caregivers, purposively sampled to include people with varying types and severity of symptoms, and time since diagnosis (see Table 1). Participants were above 18 years of age, had an MND diagnosis, and had mental capacity to consider participation in the study. We included participants who self-reported difficulties with cognition, but had mental capacity to give informed consent, as the views of pwMND who have cognitive impairment have been underrepresented in previous research. We included caregivers above 18 years of age, both current and recently bereaved (bereavement within 1 year from the time of the interview).

Table 1: Demographic and clinical details of the sample

| Characteristic           | People with MND<br>(n=25) | Caregivers<br>(n=10) |
|--------------------------|---------------------------|----------------------|
| <b>Age (range 39-80)</b> |                           |                      |
| 35-50 years              | 3                         | 0                    |
| 51-65 years              | 12                        | 4                    |
| 66-80 years              | 10                        | 6                    |
| <b>Gender</b>            |                           |                      |
| Male                     | 15                        | 5                    |
| Female                   | 10                        | 5                    |

---

**Relationship to person with MND**


---

|                |    |
|----------------|----|
| Spouse/partner | 10 |
|----------------|----|

---

**Diagnosis**


---

|          |    |
|----------|----|
| ALS limb | 18 |
|----------|----|

---

|            |   |
|------------|---|
| ALS bulbar | 1 |
|------------|---|

---

|                           |   |
|---------------------------|---|
| Primary Lateral Sclerosis | 4 |
|---------------------------|---|

---

|                          |   |
|--------------------------|---|
| Progressive Bulbar Palsy | 1 |
|--------------------------|---|

---

|                              |   |
|------------------------------|---|
| Progressive Muscular Atrophy | 1 |
|------------------------------|---|

---

**Time since diagnosis**


---

**(range 2 months-17 years)**


---

|                  |   |
|------------------|---|
| Less than 1 year | 8 |
|------------------|---|

---

|           |   |
|-----------|---|
| 1-3 years | 6 |
|-----------|---|

---

|           |   |
|-----------|---|
| 3-5 years | 7 |
|-----------|---|

---

|                   |   |
|-------------------|---|
| More than 5 years | 4 |
|-------------------|---|

---

**Difficulties reported often/always**


---

**\*(ALSAQ-5 scale)**


---

|                       |    |
|-----------------------|----|
| Difficult to stand up | 16 |
|-----------------------|----|

---

|                                 |    |
|---------------------------------|----|
| Difficult to use arms and hands | 16 |
|---------------------------------|----|

---

|                              |   |
|------------------------------|---|
| Difficulty eating solid food | 4 |
|------------------------------|---|

---

|                                  |   |
|----------------------------------|---|
| Speech is not easy to understand | 9 |
|----------------------------------|---|

---

|                                   |   |
|-----------------------------------|---|
| Feeling hopeless about the future | 3 |
|-----------------------------------|---|

---

|                                               |          |
|-----------------------------------------------|----------|
| <b>Self-reported concerns about cognitive</b> | <b>2</b> |
|-----------------------------------------------|----------|

---

**ability**


---

\*Amyotrophic Lateral Sclerosis Assessment Questionnaire (ALSAQ-5) is a patient self-report questionnaire used to briefly measure the impact of ALS/MND on patients.(28)

## Data collection

Participants were recruited through a UK charity that supports pWMND and their families (Motor Neurone Disease Association). Study information was circulated via the charity's website, newsletters, social media outlets and local support groups. People willing to take part contacted the lead author (CP), who screened for eligibility and provided further details about the interview.

29 interviews were conducted in total. Where two members of a couple had both consented to participate participants were interviewed separately where possible, but jointly where this was requested for reasons of comfort or to facilitate easier communication (n=6). Interview mode was also flexible; 14 interviews were conducted face-to-face, 8 via telephone, and 7 via email, to accommodate various symptoms and levels of disability. Before each interview, participants gave written informed consent and filled a demographic/clinical details form. Face-to-face interviews were conducted in a place convenient to participants, usually at home or a hospice. The interview topic guide (Supplementary file 1) covered questions about people's experiences living with MND, with a focus on their thoughts and feelings and coping with emotional concerns. Interviews lasted an average of 39.6 minutes.

## Data analysis

Face-to-face and phone interviews were audio recorded and transcribed, and all interviews were anonymized. Data were analyzed using reflexive thematic analysis,(29, 30) as this was a flexible method that suited the research question, helped us identify common patterns across participants' experiences and allowed us to look for underlying meaning behind experiences of emotional distress and wellbeing. The analysis was mainly conducted by CP, a PhD

1  
2  
3 student with previous experience as a qualitative researcher. After familiarisation with the  
4 interview transcripts, Nvivo 12 software was used to code the data inductively, focusing on  
5 semantic and latent features of the data. The codes went through several iterations as new  
6 interviews were coded. During the coding process, notes were made about interesting  
7 features of the data and how different concepts related to each other. Following this, similar  
8 codes about emotional distress and emotional wellbeing were grouped together and candidate  
9 themes were generated. Themes were then reviewed to see if they represented experiences  
10 across the dataset. Theme names were revised and findings written up; this was also an  
11 iterative process whereby descriptions were clarified and overlap between themes identified.  
12 CP had regular meetings with qualitative research experts LD and AG who helped refine  
13 codes and themes.  
14  
15  
16  
17  
18  
19  
20  
21  
22  
23  
24  
25  
26  
27  
28  
29  
30

### 31 **Ethics**

32 We obtained ethics from the University of Southampton ethics committee (ERGOII-46996).  
33 Written informed consent was obtained for all participants. Participants were debriefed and  
34 steps were taken following each interview to ensure participants were not distressed.  
35  
36  
37  
38  
39  
40  
41

### 42 **Patient and Public Involvement (PPI)**

43 Three PPI members (one person with MND and 2 former caregivers) contributed to this  
44 study. They were involved in the recruitment stage to help the researcher identify potential  
45 participants from local groups. PPI members also contributed to piloting the interview topic  
46 guide, refining interview questions and trialling the data collection procedure to ensure that it  
47 was not burdensome. Some PPI members also looked over the early drafts of the findings and  
48 offered insight about elements to highlight or discuss in the reporting of the results.  
49  
50  
51  
52  
53  
54  
55  
56  
57  
58  
59  
60

## RESULTS

We developed 8 themes and 20 subthemes. The first four themes relate to triggers of emotional distress (Fig 1); the remaining four themes capture strategies to improve emotional wellbeing (Fig 2). All themes were present in some degree and form in both patient and caregiver interviews; where differences between these groups were apparent, they are described.

[Insert Fig 1 here]

### Triggers of emotional distress

Participants described 4 main triggers of emotional distress and how they had an impact on emotions (themes are numbered, *subthemes in italics*).

#### (1) Losing function or ability

Most participants described how losing function or ability was distressing because of a *reduced sense of autonomy and control*. PwMND spoke about feelings of anger, frustration, sadness or grief at not being able to do the things they wanted to, at losing their independence and relying on others for help. Similarly, caregivers expressed sadness at seeing their family member lose capability and independence.

“Hobbies that I had, I can’t pursue any of them because I just don’t have any capability enough in my arms now to do that. So, I think mentally I’ve seen a dip in the last six months into a much more kind of negative and angry stage really.” (Person with MND, P13)

1  
2  
3 “...and seeing him, and it saddened me, where you’re sort of doing the job of  
4 hoisting and moving, the manual handling, and then you step back and you’re  
5 seeing it from a distance, that’s actually quite [pauses] hard as well, because  
6 he’s got no control over his body and he’s having to have people do that for  
7 him.” (Caregiver, C05)  
8  
9  
10  
11  
12  
13  
14  
15  
16

17 Losing function led to *changes in identity*, specifically those of becoming a ‘patient’ and  
18 ‘carer’. These changes, especially losing one’s voice which is strongly linked to identity,  
19 were experienced as distressing.  
20  
21  
22  
23  
24  
25

26 “Losing mobility gradually was bad enough... but losing my voice is much  
27 more dreadful. It’s taking away part of my personality. I can no longer  
28 express myself properly.” (Person with MND, P21)  
29  
30  
31  
32  
33  
34

35 Losing function or ability sometimes led to *changes in relationships and interactions*.  
36 PwMND spoke about negative feelings of becoming a burden for their partner/spouse. Both  
37 patient and caregiver participants spoke about how having MND sometimes changed or  
38 limited interactions between family members.  
39  
40  
41  
42  
43  
44  
45

46 “It’s emotionally difficult not being able to physically help my son or my  
47 parents and siblings and friends. Not being able to hold and play with my  
48 nephew.” (Person with MND, P26)  
49  
50  
51  
52  
53  
54

55 Participants also had *practical concerns or worries about managing tasks* as a result of losing  
56 more ability and function.  
57  
58  
59  
60

1  
2  
3 “My main worry at the moment really is moving him from there to there  
4  
5 because his knees and lower legs are getting weaker and I’ve got that [points  
6  
7 to hoist] to move him.” (Caregiver, C03)  
8  
9

10  
11  
12 (2) Having a threatened future  
13  
14

15 The short prognosis that accompanies a diagnosis of MND led to feelings of anger,  
16  
17 disappointment, sadness and feelings of being robbed/cheated of a future (*threat to life*  
18  
19 *narrative and future plans*).  
20  
21

22  
23  
24 “But I’m having to accept I might have a lonely old age. Disappointment,  
25  
26 more than anything else.’ (Caregiver, C27)  
27  
28

29  
30  
31 Participants also described emotional distress when *anticipating future symptoms or disease*  
32  
33 *progression*. Many things triggered worry about the future including researching MND  
34  
35 online, meeting other pwMND, discussions with healthcare professionals and going through  
36  
37 symptom checklists. Some participants also spoke about experiencing such worries about the  
38  
39 future even if symptoms had not progressed or were relatively stable. This was true  
40  
41 particularly just after diagnosis, where worries about the future led to feelings of depression,  
42  
43 low mood and withdrawal from others.  
44  
45  
46  
47

48  
49 “Even though physically, say that first month afterwards, there was almost no  
50  
51 change but my mind’s thinking quite morose almost. You almost think of  
52  
53 death at that point... It’s not even anger at that stage, it’s just hopelessness at  
54  
55 that point because you’re just thinking oh that is it isn’t it? It’s all over.”  
56  
57  
58 (Person with MND, P10)  
59  
60

1  
2  
3  
4  
5  
6 The *uncertainty of the disease progression* also caused emotional distress among both  
7  
8 patients and caregivers, because of being unable to manage symptoms or plan for the future.  
9

10  
11  
12 “I think the biggest thing about this is that it’s such an unknown. Because  
13  
14 everybody is different and, who knows how much, how long this disease is  
15  
16 going to affect you. And the uncertainty, for me, it’s very hard to cope with,  
17  
18 because you can’t make plans.’ (Caregiver, C15)  
19  
20  
21  
22  
23

### 24 (3) Keeping up with constant and multiple changes

25  
26 Participants discussed how the *timing and relentless nature of changes* in symptoms was  
27  
28 difficult physically and emotionally. As time went on, for some it became easier to fall into a  
29  
30 care routine. However, if deterioration happened quickly, both patient and caregivers  
31  
32 expressed that it was difficult to cope and left them feeling tired, not in control and in need of  
33  
34 respite.  
35  
36  
37  
38  
39  
40

41 “If something’s difficult, we find a way round it. And by the time we’ve found  
42  
43 a way round it, things have moved on again, and it doesn’t work. So that’s  
44  
45 very frustrating. And a bit... not depressing... soul destroying, because we’re  
46  
47 always playing catch up.” (Person with MND, P24)  
48  
49  
50  
51

52 Sometimes physical symptoms necessitated *changes in many areas of life*. This included  
53  
54 changes to their home, work, social and leisure activities. Both pwMND and caregivers spoke  
55  
56 about the effort involved in either living with MND or looking after someone with MND.  
57  
58 This sometimes affected thoughts and mood negatively including feelings of frustration,  
59  
60



1  
2  
3 anxiety, tiredness or strain/burden. For example, C03, a caregiver, recalled being upset and  
4  
5 needing someone to talk to due to exhaustion from physically moving her spouse; “I used to  
6  
7 get so tired that sometimes when he had gone to bed in the evening I did just feel like  
8  
9 standing there crying.”  
10  
11  
12  
13

#### 14 (4) Feeling unsupported by professionals or the care system

15  
16  
17 Participants reported feeling distressed when healthcare professionals or the care system did  
18  
19 not support their needs. *Infrequent or inefficient care provision* left people feeling abandoned  
20  
21 and left on their own to deal with MND.  
22  
23  
24  
25

26  
27 “I felt completely unsupported by the neurologist or the health service, we  
28  
29 were really just left on our own, completely in the dark as to what was gonna  
30  
31 happen... So, it was a very, very distressing time.” (Person with MND, P14)  
32  
33  
34  
35

36  
37 Poor coordination between different professionals/organizations, difficulty accessing  
38  
39 equipment and financial benefits also triggered feelings of frustration, injustice and being ‘let  
40  
41 down’ by the system.  
42  
43  
44

45  
46 *Poor or insensitive communication from healthcare professionals* added to emotional  
47  
48 distress. In particular, participants described upset as a consequence of a lack of empathy  
49  
50 from professionals, or insensitive or unsupportive presentation of care.  
51  
52  
53

54  
55 “Our life was shattered in 2 minutes. And I felt that was cruel, very very cruel  
56  
57 [pause]. There should be a way of discussing it with you and saying “well  
58  
59 look, you have such and such a condition, but hey, this is what we can do.”  
60

1  
2  
3 Not just you've got this and throw you out, and so we had to find our own way  
4  
5 round this problem." (Caregiver, C01)  
6  
7  
8  
9  
10  
11

12 [Insert Fig. 2 here]  
13  
14  
15

## 16 **Strategies used to improve emotional wellbeing**

17  
18 Participants described strategies they used to improve emotional wellbeing (themes are  
19 numbered; *subthemes in italics*).  
20  
21  
22  
23  
24

### 25 (1) Finding hope and positivity

26  
27 Despite the many losses, participants actively found ways to introduce hope and positivity.  
28  
29 For many people, acceptance of MND was a gradual, learned process and even once there  
30 was acceptance, an attitude of not giving up on life was important for coping (*acceptance and*  
31 *not giving up*). For some, not giving up included hoping for a cure or trying alternative  
32  
33 therapies. For others, not giving up included finding solutions to make life easier, and not  
34  
35 letting MND define them as they continued normal and valued activities. This strategy was  
36  
37 endorsed mainly by pwMND.  
38  
39  
40  
41  
42  
43  
44  
45  
46

47 "I try to not challenge myself, but make sure there's nothing I'm not doing  
48  
49 because of it. Almost in a way to say, it's not going to control me or control  
50  
51 what I do." (Person with MND, P18)  
52  
53  
54  
55  
56  
57  
58  
59  
60

1  
2  
3 Despite severe losses of function, many participants continued *doing activities that they*  
4 *enjoyed and that were meaningful*. Planning ahead and having things to look forward to in  
5  
6 the immediate future added to feelings of hope.  
7  
8  
9

10  
11  
12 “Key thing is to have lots of little goals, lots of little hopes of things to do,  
13 normalities, weekends away, holidays but not in the far future. Everything’s in  
14 a couple of weeks, 2-3 weeks, something to look forward to... it keeps the  
15 mind occupied to know that there is something coming up.” (Person with  
16 MND, P10)  
17  
18  
19  
20  
21  
22  
23  
24  
25

26 Most participants tried to *focus on the positive aspects of life*. This strategy became difficult  
27 in the context of increasing loss, but participants still stressed that it was important.  
28  
29  
30  
31  
32

33 “I’m still sad that I can’t do the things that I used to be able to do. But you do  
34 learn to try and be positive about living with the condition as best you can and  
35 to live your life as well as you can.” (Person with MND, P14)  
36  
37  
38  
39  
40  
41

42 To stay positive and deal with negative emotions, participants tried to reframe difficult  
43 situations by focusing on what they still can do, using humour, feeling grateful for symptoms  
44 they did not have or feeling lucky because of their circumstances or because of the support  
45 they received.  
46  
47  
48  
49  
50  
51

## 52 53 (2) Exerting some control

54  
55 When MND took some control away, participants found other ways to exert control over  
56 their lives. Although a sense of control was important for most participants, they exerted this  
57  
58  
59  
60

1  
2  
3 control in very different ways. One way was by *focusing on the present moment* and making  
4 the most of what they could currently do. This strategy was adopted mainly by pwMND; it  
5 stopped them from worrying about the future or feeling sad for what they could no longer do,  
6 and instead had a more positive impact on emotions.  
7  
8  
9  
10  
11  
12  
13

14 “I realised there’s absolutely no point in dwelling on the past because there’s  
15 absolutely nothing I can do to get that back. So, it’s waste of energy and  
16 there’s no point in worrying about the future because there’s absolutely  
17 nothing I can do about it. So, what I kind of taught myself to do is try to live in  
18 here and now because I do have some control over that.” (Person with MND,  
19 P04)  
20  
21  
22  
23  
24  
25  
26  
27  
28  
29  
30

31 Some participants described how it was helpful to exert *control over decisions about their*  
32 *care*, organizing or planning care and taking a more active problem-solving approach. This  
33 gave people a sense of empowerment when they would otherwise be struggling to cope, and  
34 also helped people hold onto their independence or identity despite the loss.  
35  
36  
37  
38  
39  
40  
41

42 “I hate the fact that I can’t talk. Although I can talk, but it’s a bit drained and  
43 doesn’t sound like me. But I’ve done voice banking and I think you’ve got to  
44 be a step ahead.” (Person with MND, P19)  
45  
46  
47  
48  
49  
50  
51

52 However, some people exerted control by avoiding interactions or information that might  
53 remind them of future symptoms or deterioration and associated negative emotions.  
54  
55  
56  
57  
58  
59  
60

1  
2  
3 “Everyone’s different, aren’t they? And their MND is different. Some people  
4 like to know the ins and out, but I don’t know, I like to bury my head in the  
5 sand. Because I know that I would sit and worry about it all the time. And I  
6 don’t want to.” (Person with MND, P24)  
7  
8  
9  
10  
11  
12  
13

### 14 (3) Being kinder to oneself

15  
16 This strategy was mentioned by both pwMND and caregivers but for different kinds of tasks.  
17  
18 Living with MND was often described as overwhelming and participants expressed the need  
19 for *taking a break* from MND. Caregivers spoke about the need to take a physical break from  
20 MND care; while pwMND spoke about taking a break from MND by doing regular activities  
21 and not thinking about MND.  
22  
23  
24  
25  
26  
27  
28  
29  
30

31 “I’ll have days where I deliberately avoid looking at anything and trying just  
32 to have days or a couple of days where I don’t think about MND.” (Person  
33 with MND, P18)  
34  
35  
36  
37  
38  
39  
40

41 Some participants also expressed the need to give themselves *time and space to adjust to*  
42 *changes* in symptoms. This was done by allowing themselves space to vent if they felt  
43 overwhelmed, pacing their activities, lowering expectations, modifying how tasks were done,  
44 or asking for help.  
45  
46  
47  
48  
49  
50  
51

52 “Keep doing the things you enjoy, just lower your expectations and standards  
53 so you achieve and don’t feel disappointed.” (Person with MND, P21)  
54  
55  
56  
57  
58

### 59 (4) Experiencing support from others

1  
2  
3 *Emotional and practical support* from healthcare professionals, friends and family helped  
4  
5  
6  
7  
8  
9  
10  
11  
12  
13  
14  
15  
16  
17  
18  
19  
20  
21  
22  
23  
24  
25  
26  
27  
28  
29  
30  
31  
32  
33  
34  
35  
36  
37  
38  
39  
40  
41  
42  
43  
44  
45  
46  
47  
48  
49  
50  
51  
52  
53  
54  
55  
56  
57  
58  
59  
60

*Emotional and practical support* from healthcare professionals, friends and family helped  
pwMND and caregivers cope with any emotional distress. Emotional support included  
being empathic, listening, being encouraging and positive. Participants also valued  
support from other people with MND because they felt truly understood and less alone.

“I had a confirmation diagnosis at [hospital] and then I had a phone call from  
the [hospice] asking if I wanted to attend a kind of MND first contact group...  
and it’s been a fantastic thing and I still go now. And that was really good,  
really supportive.” (Person with MND, P19)

There were some differing views about the timing of offering support, especially just after  
diagnosis. Some participants wanted access to information and support almost immediately,  
however others needed some time to adjust before they accessed support.

*Supportive communication from healthcare professionals and reliability of care* helped  
patients and families feel reassured and confident about their care, which led to positive  
experiences and emotions. This included providing information based on the patient and  
families’ readiness, communicating information in a sensitive and empathic manner, focusing  
on what can be done in terms of care and timely provision of care and equipment.

“I would also mention my occupational therapist who has been brilliant at  
assessing my needs and getting in equipment quickly, usually just before they  
were needed. This has given me more confidence in the care and support I am  
given.” (Person with MND, P22)

## DISCUSSION

This study provides an in-depth understanding of the experience of emotional distress and emotional wellbeing among people with MND and their caregivers, and identifies triggers of distress and strategies used to improve wellbeing. Our findings come from a diverse sample, thereby highlighting key triggers of distress and coping strategies used by people with different abilities, symptoms and at different stages of having MND. PwMND and caregivers use coping strategies differently but still rely on similar concepts (hope, positivity, control, self-kindness, social support) to improve emotional wellbeing.

Some of our findings are in line with previous MND research, such as the distress caused by loss of ability, threats to the future,(10, 14, 15, 31) and not receiving appropriate professional support.(6, 7, 26, 32) One new finding in MND literature is the emotional distress triggered by multiple and constant changes brought about by disease progression and constantly 'playing catch up.' This has been described in research around caregiver experience;(33-35) we highlight how this is also distressing for pwMND. Interventions must consider this context of being overwhelmed by relentless change and ensure interventions are perceived as manageable, not burdensome.

We know that coping strategies are important for maintaining emotional wellbeing in MND,(23, 36, 37) and that hope and control are important for coping with MND.(10, 31, 38-40) Our findings go a step further to illustrate how these coping strategies relate to emotional wellbeing, particularly in the context of MND. For example, we illustrate the complexity of 'not giving up' and finding positivity in a degenerative disease where hope is constantly threatened. Our study also highlights the use meaning-based coping strategies (finding hope and positivity in the face of difficult circumstances and reappraising them in a positive way),

1  
2  
3 which generates positive affect and helps people make sense of what is happening in the  
4 context of goals that may be untenable.(41) Our findings show how control is exerted  
5 differently in the face of loss, by having more of a focus on the present moment, and by  
6 making own decisions about receiving information and care. This has implications for  
7 support services, especially in providing options for care, equipment and communication  
8 aids.(42) The importance of focusing on the present demonstrates the value of mindfulness-  
9 based approaches for psychological interventions. Another novel finding in relation to  
10 emotional wellbeing and MND is the importance of self-kindness and self-care. Self-  
11 compassion has been associated with adaptive coping strategies and wellbeing other chronic  
12 illnesses (43-45) and similar approaches may be useful for pwMND and their caregivers.  
13  
14  
15  
16  
17  
18  
19  
20  
21  
22  
23  
24  
25  
26  
27

### 28 **Strengths and Limitations**

29  
30 We aimed to recruit a diverse range of participants and succeeded in sampling people with  
31 different symptoms of varying severities, particularly people with difficulties speaking.  
32 However, we did not manage to recruit many people with mild cognitive impairment.  
33  
34 Although we captured the experiences of newly diagnosed people and people who had MND  
35 for several years, we could not ascertain if we captured the experiences of people who were  
36 at the end stages. Distress and coping strategies used by these groups may be very different  
37 and findings need to be applied bearing this in mind.  
38  
39  
40  
41  
42  
43  
44  
45  
46  
47

### 48 **Conclusion**

49  
50 We provide an in-depth and consolidated understanding of what impacts emotional distress  
51 and wellbeing among pwMND and their caregivers. Findings have important implications for  
52 psychological interventions, services and professionals that support pwMND and their  
53 families. Any communication and support provided for pwMND and their caregivers, needs  
54 to pay attention to concepts of hope, control, and compassion.  
55  
56  
57  
58  
59  
60



**Funding statement:**

This work was supported by the Motor Neurone Disease Association, UK under Grant [Yardley/May17/891-792].

**Competing interest statement:**

The authors report no conflict of interest.

**Data availability statement:**

Anonymised interview transcripts can be made available upon reasonable request from the corresponding author Cathryn Pinto ([C.L.Pinto@soton.ac.uk](mailto:C.L.Pinto@soton.ac.uk)).

**Author contributions:**

Cathryn Pinto: Main contributor to the design of the study, ethics application, recruitment and data collection, data analysis, reporting and publication of findings.

Dr. Adam Geraghty: Involved in obtaining funding for the study, contributed to the study design, supervised Cathryn during recruitment, data collection and data analysis, and contributed to the reporting and publication of findings.

Prof. Lucy Yardley: Involved in obtaining funding for the study, contributed to the study design and the reporting and publication of findings.

Dr. Laura Dennison: Involved in obtaining funding for the study, contributed to the study design, supervised Cathryn during recruitment, data collection and data analysis, and contributed to the reporting and publication of findings.

1  
2  
3  
4  
5  
6  
7  
8  
9  
10  
11  
12  
13  
14  
15  
16  
17  
18  
19  
20  
21  
22  
23  
24  
25  
26  
27  
28  
29  
30  
31  
32  
33  
34  
35  
36  
37  
38  
39  
40  
41  
42  
43  
44  
45  
46  
47  
48  
49  
50  
51  
52  
53  
54  
55  
56  
57  
58  
59  
60

For peer review only

## References

1. Moore C, McDermott CJ, Shaw PJ. Clinical aspects of motor neurone disease. *Medicine*. 2008;36(12):640-5.
2. Clarke DM, McLeod JE, Smith GC, Trauer T, Kissane DW. A comparison of psychosocial and physical functioning in patients with motor neurone disease and metastatic cancer. *Journal of palliative care*. 2005;21(3):173-9.
3. Goldstein LH, Adamson M, Jeffrey L, Down K, Barby T, Wilson C, et al. The psychological impact of MND on patients and carers. *Journal of the Neurological Sciences*. 1998;160:S114-S21.
4. Hogg K, Goldstein LH, Leigh P. The psychological impact of motor neurone disease. *Psychological medicine*. 1994;24(3):625-32.
5. O'Brien MR, Whitehead B, Jack BA, et al. From symptom onset to a diagnosis of amyotrophic lateral sclerosis/motor neuron disease (ALS/MND): experiences of people with ALS/MND and family carers—a qualitative study. *Amyotrophic lateral sclerosis*. 2011;12(2):97-104.
6. Pavey A, Allen-Collinson J, Pavey T. The lived experience of diagnosis delivery in motor neurone disease: a sociological-phenomenological study. *Sociological research online*. 2013;18(2):36-47.
7. O'Brien MR, Whitehead B, Jack BA, et al. The need for support services for family carers of people with motor neurone disease (MND): views of current and former family caregivers a qualitative study. *Disability and rehabilitation*. 2012;34(3):247-56.
8. Averill AJ, Kasarskis EJ, Segerstrom SC. Psychological health in patients with amyotrophic lateral sclerosis. *Amyotrophic Lateral Sclerosis*. 2007;8(4):243-54.
9. McLeod JE, Clarke DM. A review of psychosocial aspects of motor neurone disease. *Journal of the neurological sciences*. 2007;258(1-2):4-10.
10. Soundy A, Condon N. Patients experiences of maintaining mental well-being and hope within motor neuron disease: a thematic synthesis. *Frontiers in psychology*. 2015;6:606.
11. Goldstein L, Atkins L, Landau S, et al. Longitudinal predictors of psychological distress and self-esteem in people with ALS. *Neurology*. 2006;67(9):1652-8.
12. Bolmsjö I. Existential issues in palliative care: interviews of patients with amyotrophic lateral sclerosis. *Journal of palliative medicine*. 2001;4(4):499-505.
13. Foley G, O'Mahony P, Hardiman O. Perceptions of quality of life in people with ALS: effects of coping and health care. *Amyotrophic lateral sclerosis*. 2007;8(3):164-9.
14. Mistry K, Simpson J. Exploring the transitional process from receiving a diagnosis to living with motor neurone disease. *Psychology & health*. 2013;28(8):939-53.
15. Sakellariou D, Boniface G, Brown P. Experiences of living with motor neurone disease: a review of qualitative research. *Disability and rehabilitation*. 2013;35(21):1765-73.
16. Goldstein LH, Leigh PN. Motor neurone disease: a review of its emotional and cognitive consequences for patients and its impact on carers. *British Journal of Health Psychology*. 1999;4(3):193-208.
17. Pagnini F. Psychological wellbeing and quality of life in amyotrophic lateral sclerosis: a review. *International Journal of Psychology*. 2013;48(3):194-205.
18. Rabkin JG, Albert SM, Rowland LP, et al. How common is depression among ALS caregivers? A longitudinal study. *Amyotrophic Lateral Sclerosis*. 2009;10(5-6):448-55.
19. Cox DL. Perspectives of motor neurone disease. *Clinical rehabilitation*. 1992;6(4):333-9.
20. Brown JB. User, carer and professional experiences of care in motor neurone disease. *Primary Health Care Research & Development*. 2003;4(3):207-17.

21. Olsson Ozanne AG, Strang S, Persson LI. Quality of life, anxiety and depression in ALS patients and their next of kin. *Journal of clinical nursing*. 2011;20(1-2):283-91.
22. Goldstein L, Atkins L, Leigh P. Correlates of quality of life in people with motor neuron disease (MND). *Amyotrophic Lateral Sclerosis and Other Motor Neuron Disorders*. 2002;3(3):123-9.
23. Matuz T, Birbaumer N, Hautzinger M, et al. Psychosocial adjustment to ALS: a longitudinal study. *Frontiers in psychology*. 2015;6:1197.
24. Gould RL, Coulson MC, Brown RG, et al. Psychotherapy and pharmacotherapy interventions to reduce distress or improve well-being in people with amyotrophic lateral sclerosis: A systematic review. *Amyotrophic Lateral Sclerosis and Frontotemporal Degeneration*. 2015;16(5-6):293-302.
25. Locock L, Mazanderani F, Powell J. Metaphoric language and the articulation of emotions by people affected by motor neurone disease. *Chronic illness*. 2012;8(3):201-13.
26. Whitehead B, O'Brien MR, Jack BA, et al. Experiences of dying, death and bereavement in motor neurone disease: a qualitative study. *Palliative Medicine*. 2012;26(4):368-78.
27. Tong A, Sainsbury P, Craig J. Consolidated criteria for reporting qualitative research (COREQ): a 32-item checklist for interviews and focus groups. *International journal for quality in health care*. 2007;19(6):349-57.
28. Jenkinson C, Fitzpatrick R. Reduced item set for the amyotrophic lateral sclerosis assessment questionnaire: development and validation of the ALSAQ-5. *Journal of Neurology, Neurosurgery & Psychiatry*. 2001;70(1):70-3.
29. Braun V, Clarke V. Using thematic analysis in psychology. *Qualitative research in psychology*. 2006;3(2):77-101.
30. Braun V, Clarke V. Reflecting on reflexive thematic analysis. *Qualitative Research in Sport, Exercise and Health*. 2019;11(4):589-97.
31. Foley G, Timonen V, Hardiman O. Exerting control and adapting to loss in amyotrophic lateral sclerosis. *Social Science & Medicine*. 2014;101:113-9.
32. Hugel H, Grundy N, Rigby S, et al. How does current care practice influence the experience of a new diagnosis of motor neuron disease? A qualitative study of current guidelines-based practice. *Amyotrophic lateral sclerosis*. 2006;7(3):161-6.
33. Oyebode JR, Smith H-J, Morrison K. The personal experience of partners of individuals with motor neuron disease. *Amyotrophic Lateral Sclerosis and Frontotemporal Degeneration*. 2013;14(1):39-43.
34. Galvin M, Corr B, Madden C, et al. Caregiving in ALS—a mixed methods approach to the study of burden. *BMC palliative care*. 2016;15(1):81.
35. Aoun SM, Bentley B, Funk L, et al. A 10-year literature review of family caregiving for motor neurone disease: moving from caregiver burden studies to palliative care interventions. *Palliative medicine*. 2013;27(5):437-46.
36. Larsson BJ, Nordin K, Nygren I. Coping with amyotrophic lateral sclerosis; from diagnosis and during disease progression. *Journal of the neurological sciences*. 2016;361:235-42.
37. Jakobsson Larsson B, Nordin K, Askmark H, et al. Coping strategies among patients with newly diagnosed amyotrophic lateral sclerosis. *Journal of clinical nursing*. 2014;23(21-22):3148-55.
38. Fanos JH, Gelinas DF, Foster RS, et al. Hope in palliative care: from narcissism to self-transcendence in amyotrophic lateral sclerosis. *Journal of Palliative Medicine*. 2008;11(3):470-5.

- 1  
2  
3 39. Foley G, Timonen V, Hardiman O. Understanding psycho-social processes  
4 underpinning engagement with services in motor neurone disease: a qualitative study.  
5 *Palliative medicine*. 2014;28(4):318-25.  
6  
7 40. Holkham L, Soundy A. The experience of informal caregivers of patients with motor  
8 neurone disease: a thematic synthesis. *Palliative & supportive care*. 2018;16(4):487-96.  
9  
10 41. Folkman S, Greer S. Promoting psychological well-being in the face of serious  
11 illness: when theory, research and practice inform each other. *Psycho-Oncology: Journal of*  
12 *the Psychological, Social and Behavioral Dimensions of Cancer*. 2000;9(1):11-9.  
13  
14 42. Pavey A, Warren N, Allen-Collinson J. "It gives me my freedom": Technology and  
15 responding to bodily limitations in motor neuron disease. *Medical anthropology*.  
16 2015;34(5):442-55.  
17  
18 43. Sirois FM, Molnar DS, Hirsch JK. Self-compassion, stress, and coping in the context  
19 of chronic illness. *Self and Identity*. 2015;14(3):334-47.  
20  
21 44. Wren AA, Somers TJ, Wright MA, et al. Self-compassion in patients with persistent  
22 musculoskeletal pain: relationship of self-compassion to adjustment to persistent pain.  
23 *Journal of pain and symptom management*. 2012;43(4):759-70.  
24  
25 45. Pinto-Gouveia J, Duarte C, Matos M, et al. The protective role of self-compassion in  
26 relation to psychopathology symptoms and quality of life in chronic and in cancer patients.  
27 *Clinical psychology & psychotherapy*. 2014;21(4):311-23.  
28  
29  
30  
31  
32  
33  
34  
35  
36  
37  
38  
39  
40  
41  
42  
43  
44  
45  
46  
47  
48  
49  
50  
51  
52  
53  
54  
55  
56  
57  
58  
59  
60

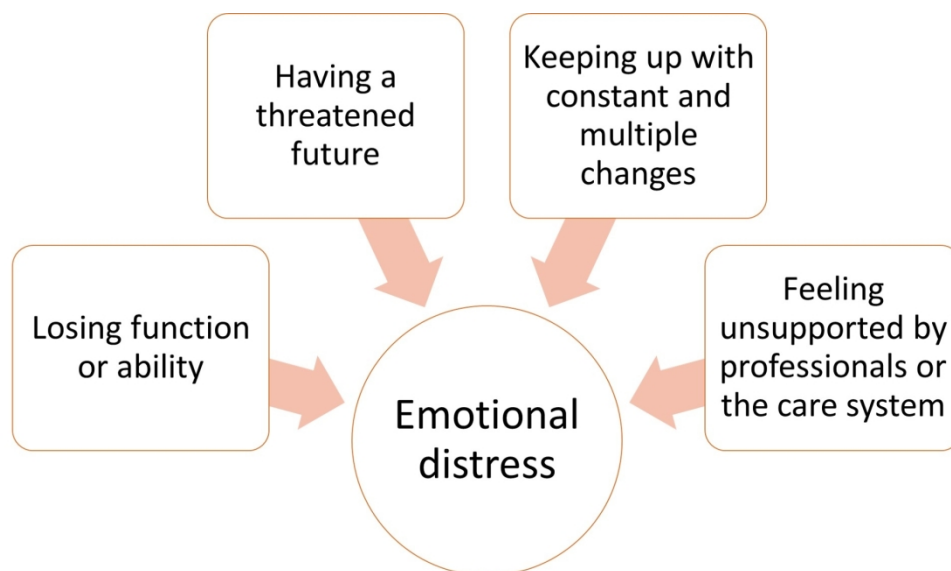

Figure 1. Triggers of emotional distress

167x94mm (300 x 300 DPI)

1  
2  
3  
4  
5  
6  
7  
8  
9  
10  
11  
12  
13  
14  
15  
16  
17  
18  
19  
20  
21  
22  
23  
24  
25  
26  
27  
28  
29  
30  
31  
32  
33  
34  
35  
36  
37  
38  
39  
40  
41  
42  
43  
44  
45  
46  
47  
48  
49  
50  
51  
52  
53  
54  
55  
56  
57  
58  
59  
60

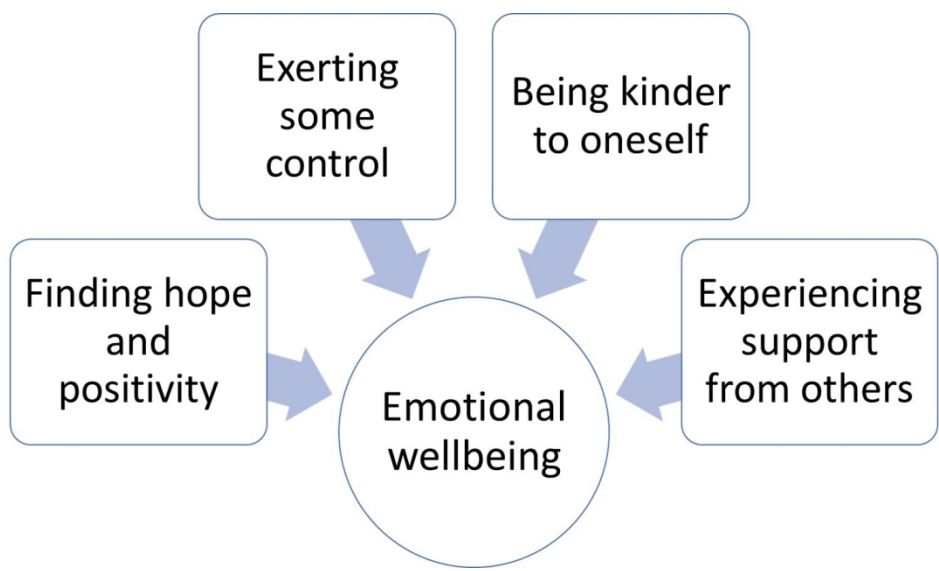

Figure 2. Strategies used to improve emotional wellbeing

427x236mm (96 x 96 DPI)

## SUPPLEMENTARY FILE 1

### 1. Interview topic guide

- (1) Can you tell me about your experience with MND?
  - wherever the participant would like to start, could be about diagnosis or their experience now.
  - Have your thoughts and feelings changed since you were diagnosed or are they the same? (If different, in what way have they changed?)
- (2) What's it like to live with MND? Can you tell me a bit more about that?
  - What are your main concerns/worries/emotions you face on a day to day basis?
  - What are your thoughts and feelings about living with MND?
- (3) Can you tell me about how you manage MND on a daily basis? If you find yourself having emotional concerns or worries, do you have any ways of managing them?
- (4) Can you tell me about any support you feel you have? Or people/ things/ processes that have helped you?
- (5) (In addition to this support) Do you have any thoughts about what else might support you to cope with MND?



1  
2  
3  
4  
5  
6  
7  
8  
9  
10  
11  
12  
13  
14  
15  
16  
17  
18  
19  
20  
21  
22  
23  
24  
25  
26  
27  
28  
29  
30  
31  
32  
33  
34  
35  
36  
37  
38  
39  
40  
41  
42  
43  
44  
45  
46  
47  
48  
49  
50  
51  
52  
53  
54  
55  
56  
57  
58  
59  
60

- particularly additional support with any emotional concerns/worries that participants have previously mentioned.

For peer review only

1  
2  
3  
4  
5 **SUPPLEMENTARY FILE 2**  
6  
7

8 **2. Consolidated criteria for reporting qualitative studies (COREQ):**  
9

10  
11 Tong A, Sainsbury P, Craig J. Consolidated criteria for reporting qualitative research  
12 (COREQ): a 32-item checklist for interviews and focus groups. *International Journal for*  
13 *Quality in Health Care*. 2007. Volume 19, Number 6: pp. 349 – 357  
14  
15  
16  
17

| No. Item                                       | Guide questions/description                                                                              | Reported on Page #                                                                                                                                                                                                                                   |
|------------------------------------------------|----------------------------------------------------------------------------------------------------------|------------------------------------------------------------------------------------------------------------------------------------------------------------------------------------------------------------------------------------------------------|
| <b>Domain 1: Research team and reflexivity</b> |                                                                                                          |                                                                                                                                                                                                                                                      |
| <i>Personal Characteristics</i>                |                                                                                                          |                                                                                                                                                                                                                                                      |
| 1. Interviewer/facilitator                     | Which author/s conducted the interview or focus group?                                                   | CP – Methods section                                                                                                                                                                                                                                 |
| 2. Credentials                                 | What were the researcher's credentials? E.g. PhD, MD                                                     | PhD student – Methods section, Pg 8                                                                                                                                                                                                                  |
| 3. Occupation                                  | What was their occupation at the time of the study?                                                      | PhD student – Methods section, Pg 8                                                                                                                                                                                                                  |
| 4. Gender                                      | Was the researcher male or female?                                                                       | Female                                                                                                                                                                                                                                               |
| 5. Experience and training                     | What experience or training did the researcher have?                                                     | Methods section – Pg 8-9                                                                                                                                                                                                                             |
| <i>Relationship with participants</i>          |                                                                                                          |                                                                                                                                                                                                                                                      |
| 6. Relationship established                    | Was a relationship established prior to study commencement?                                              | No                                                                                                                                                                                                                                                   |
| 7. Participant knowledge of the interviewer    | What did the participants know about the researcher? e.g. personal goals, reasons for doing the research | Participants knew that the researcher was a PhD student at the University of Southampton, doing her PhD on emotional distress and wellbeing in Motor Neurone Disease (MND). This information was described on the participant information sheets and |

|                                          |                                                                                                                                                             |                                                                                                                                                                                |
|------------------------------------------|-------------------------------------------------------------------------------------------------------------------------------------------------------------|--------------------------------------------------------------------------------------------------------------------------------------------------------------------------------|
|                                          |                                                                                                                                                             | study adverts.                                                                                                                                                                 |
| 8. Interviewer characteristics           | What characteristics were reported about the interviewer/facilitator?<br>e.g. Bias, assumptions, reasons and interests in the research topic                | The interviewer did not have much prior knowledge of MND, but had previously worked with and interviewed people with Parkinson's disease and people receiving palliative care. |
| <b>Domain 2: study design</b>            |                                                                                                                                                             |                                                                                                                                                                                |
| <i>Theoretical framework</i>             |                                                                                                                                                             |                                                                                                                                                                                |
| 9. Methodological orientation and Theory | What methodological orientation was stated to underpin the study?<br>e.g. grounded theory, discourse analysis, ethnography, phenomenology, content analysis | The study used methods (in-depth semi-structured interviews and reflexive thematic analysis) in line with a phenomenological orientation.                                      |
| <i>Participant selection</i>             |                                                                                                                                                             |                                                                                                                                                                                |
| 10. Sampling                             | How were participants selected?<br>e.g. purposive, convenience, consecutive, snowball                                                                       | Purposive sampling – Methods section, Pg 6                                                                                                                                     |
| 11. Method of approach                   | How were participants approached? e.g. face-to-face, telephone, mail, email                                                                                 | Methods section – Pg 8                                                                                                                                                         |
| 12. Sample size                          | How many participants were in the study?                                                                                                                    | Methods section – Pg 6                                                                                                                                                         |
| 13. Non-participation                    | How many people refused to participate or dropped out?<br>Reasons?                                                                                          | Participants contacted the research if they wanted to take part in an interview. No one dropped out.                                                                           |
| <i>Setting</i>                           |                                                                                                                                                             |                                                                                                                                                                                |
| 14. Setting of data collection           | Where was the data collected? e.g. home, clinic, workplace                                                                                                  | Methods section – Pg 8                                                                                                                                                         |
| 15. Presence of non-participants         | Was anyone else present besides the participants and researchers?                                                                                           | No                                                                                                                                                                             |
| 16. Description of sample                | What are the important characteristics of the sample? e.g. demographic data, date                                                                           | Methods section – Pgs 6-7                                                                                                                                                      |
| <i>Data collection</i>                   |                                                                                                                                                             |                                                                                                                                                                                |
| 17. Interview guide                      | Were questions, prompts, guides                                                                                                                             | Methods section, Pg 8 and                                                                                                                                                      |

|                                        |                                                                          |                                                                                                                                                        |
|----------------------------------------|--------------------------------------------------------------------------|--------------------------------------------------------------------------------------------------------------------------------------------------------|
|                                        | provided by the authors? Was it pilot tested?                            | supplementary file 1                                                                                                                                   |
| 18. Repeat interviews                  | Were repeat interviews carried out? If yes, how many?                    | N/A                                                                                                                                                    |
| 19. Audio/visual recording             | Did the research use audio or visual recording to collect the data?      | Methods section – Pg 8                                                                                                                                 |
| 20. Field notes                        | Were field notes made during and/or after the interview or focus group?  | Field notes were made after each interview.                                                                                                            |
| 21. Duration                           | What was the duration of the interviews or focus group?                  | Average duration reported – Methods section, Pg 8                                                                                                      |
| 22. Data saturation                    | Was data saturation discussed?                                           | No. We were not aiming for theoretical data saturation, but rather to look at patterns of experience across participants with diverse characteristics. |
| 23. Transcripts returned               | Were transcripts returned to participants for comment and/or correction? | No                                                                                                                                                     |
| <b>Domain 3: analysis and findings</b> |                                                                          |                                                                                                                                                        |
| <i>Data analysis</i>                   |                                                                          |                                                                                                                                                        |
| 24. Number of data coders              | How many data coders coded the data?                                     | One – Methods section, Pgs 8-9                                                                                                                         |
| 25. Description of the coding tree     | Did authors provide a description of the coding tree?                    | N/A                                                                                                                                                    |
| 26. Derivation of themes               | Were themes identified in advance or derived from the data?              | Inductive thematic analysis – Methods section, Pg 8-9                                                                                                  |
| 27. Software                           | What software, if applicable, was used to manage the data?               | NVivo                                                                                                                                                  |
| 28. Participant checking               | Did participants provide feedback on the findings?                       | A summary of findings was sent to participants and some participants reported that the overall findings resonated with their experience.               |
| <i>Reporting</i>                       |                                                                          |                                                                                                                                                        |
| 29. Quotations presented               | Were participant quotations                                              | Yes, Results section                                                                                                                                   |

|                                  |                                                                                                     |                                                                                                |
|----------------------------------|-----------------------------------------------------------------------------------------------------|------------------------------------------------------------------------------------------------|
|                                  | presented to illustrate the themes/findings? Was each quotation identified? e.g. participant number |                                                                                                |
| 30. Data and findings consistent | Was there consistency between the data presented and the findings?                                  | Yes, illustrative quotations have been provided for each theme and sub-theme – Results section |
| 31. Clarity of major themes      | Were major themes clearly presented in the findings?                                                | Results section and presented in Figures 1 & 2                                                 |
| 32. Clarity of minor themes      | Is there a description of diverse cases or discussion of minor themes?                              | Description of diverse cases embedded within the explanation of themes – Results section       |

# BMJ Open

## Emotional distress and wellbeing: a thematic analysis of interviews with people with Motor Neurone Disease (MND) and their family caregivers

|                                 |                                                                                                                                                                                                                                                                                                  |
|---------------------------------|--------------------------------------------------------------------------------------------------------------------------------------------------------------------------------------------------------------------------------------------------------------------------------------------------|
| Journal:                        | <i>BMJ Open</i>                                                                                                                                                                                                                                                                                  |
| Manuscript ID                   | bmjopen-2020-044724.R1                                                                                                                                                                                                                                                                           |
| Article Type:                   | Original research                                                                                                                                                                                                                                                                                |
| Date Submitted by the Author:   | 23-Dec-2020                                                                                                                                                                                                                                                                                      |
| Complete List of Authors:       | Pinto, Cathryn; University of Southampton, Psychology<br>Geraghty, Adam; University of Southampton, Primary Care and Population Sciences<br>Yardley, Lucy; University of Southampton, Psychology; University of Bristol, School of Health Sciences<br>Dennison, Laura; University of Southampton |
| <b>Primary Subject Heading</b>: | Neurology                                                                                                                                                                                                                                                                                        |
| Secondary Subject Heading:      | Qualitative research, Mental health                                                                                                                                                                                                                                                              |
| Keywords:                       | Motor neurone disease < NEUROLOGY, Depression & mood disorders < PSYCHIATRY, Anxiety disorders < PSYCHIATRY, QUALITATIVE RESEARCH                                                                                                                                                                |
|                                 |                                                                                                                                                                                                                                                                                                  |

SCHOLARONE™  
Manuscripts



I, the Submitting Author has the right to grant and does grant on behalf of all authors of the Work (as defined in the below author licence), an exclusive licence and/or a non-exclusive licence for contributions from authors who are: i) UK Crown employees; ii) where BMJ has agreed a CC-BY licence shall apply, and/or iii) in accordance with the terms applicable for US Federal Government officers or employees acting as part of their official duties; on a worldwide, perpetual, irrevocable, royalty-free basis to BMJ Publishing Group Ltd ("BMJ") its licensees and where the relevant Journal is co-owned by BMJ to the co-owners of the Journal, to publish the Work in this journal and any other BMJ products and to exploit all rights, as set out in our [licence](#).

The Submitting Author accepts and understands that any supply made under these terms is made by BMJ to the Submitting Author unless you are acting as an employee on behalf of your employer or a postgraduate student of an affiliated institution which is paying any applicable article publishing charge ("APC") for Open Access articles. Where the Submitting Author wishes to make the Work available on an Open Access basis (and intends to pay the relevant APC), the terms of reuse of such Open Access shall be governed by a Creative Commons licence – details of these licences and which [Creative Commons](#) licence will apply to this Work are set out in our licence referred to above.

Other than as permitted in any relevant BMJ Author's Self Archiving Policies, I confirm this Work has not been accepted for publication elsewhere, is not being considered for publication elsewhere and does not duplicate material already published. I confirm all authors consent to publication of this Work and authorise the granting of this licence.

1  
2  
3 **1 Emotional distress and wellbeing: a thematic analysis of interviews with**  
4  
5  
6 **2 people with Motor Neurone Disease (MND) and their family caregivers**  
7  
8

9  
10 3 Cathryn Pinto,<sup>a\*</sup> Adam W A Geraghty<sup>b</sup>, Lucy Yardley<sup>a,c</sup> and Laura Dennison<sup>a</sup>  
11  
12

13 4  
14  
15  
16 5 *<sup>a</sup>Department of psychology, University of Southampton, Southampton, UK;*  
17  
18

19  
20 6 *<sup>b</sup>Primary care, population sciences and medical education, University of Southampton,*  
21  
22 7 *Southampton, UK;*  
23  
24

25 8 *<sup>c</sup>School of psychological science, University of Bristol, Bristol, UK*  
26  
27

28  
29 9 \*Corresponding author: Cathryn Pinto, University of Southampton, B44 Highfield campus,  
30  
31 10 Southampton SO17 1BJ Email: [C.L.Pinto@soton.ac.uk](mailto:C.L.Pinto@soton.ac.uk)  
32  
33

34 11

35  
36  
37 12  
38  
39

40 13 Word count: 4339 (including quotes and table)  
41  
42

43 14  
44  
45

46 15  
47  
48  
49  
50  
51  
52  
53  
54  
55  
56  
57  
58  
59  
60



## Abstract

**Objective:** We aimed to get an in-depth understanding of the emotions experienced by people with Motor Neurone Disease (MND) and their caregivers and to explore what impacts emotional distress and wellbeing.

**Design:** Qualitative study using semi-structured interviews with people with MND and caregivers.

**Setting:** Participants were recruited from across the UK and took part in interviews conducted either face-to-face, by telephone or email to accommodate for varying levels of disability.

**Participants:** 25 people with MND and 10 caregivers took part. Participants were purposively sampled based on their MND diagnosis, symptoms and time since diagnosis.

**Data analysis:** Data were analysed using inductive reflexive thematic analysis.

**Results:** Eight broad themes were generated (20 subthemes). Participants described the emotional distress of losing physical function and having a threatened future because of poor prognosis. Keeping up with constant changes in symptoms and feeling unsupported by the healthcare system added to emotional distress. Finding hope and positivity, exerting some control, being kinder to oneself, and experiencing support from others were helpful strategies for emotional wellbeing.

**Conclusion:** We provide an in-depth understanding of what impacts emotional distress and wellbeing and discuss implications for psychological interventions for people with MND and their family. Any communication and support provided for people with MND and their caregivers, needs to pay attention to concepts of hope, control, and compassion.

1  
2  
3 1 Keywords: Motor neuron disease; Amyotrophic lateral sclerosis; emotional distress;  
4  
5 2 wellbeing; depression; qualitative research  
6  
7  
8  
9 3  
10  
11

12 4 **Article summary (Strengths and Limitations):**  
13

- 14 5 • Purposive sampling and flexible recruitment strategies were used to capture  
15  
16 6 experiences of people with MND with a range of symptoms, and at different lengths  
17  
18 7 of time since diagnosis.  
19  
20 8 • Participants with mild cognitive impairment were underrepresented in the sample.  
21  
22 9 • Conducting email interviews ensured we included the experiences of people with  
23  
24 10 speech difficulties; however there were some methodological difficulties in using  
25  
26 11 prompts and asking follow up questions.  
27  
28 12 • Study design did not allow us to see changes in emotional of distress and wellbeing  
29  
30  
31 13 over time, as symptoms change and people find new ways to adjust to changes.  
32  
33  
34  
35  
36  
37  
38  
39  
40  
41  
42  
43  
44  
45  
46  
47  
48  
49  
50  
51  
52  
53  
54  
55  
56  
57  
58  
59  
60

## 1 INTRODUCTION

2 Motor neurone disease (MND) is a neurodegenerative disease, which results in declining  
3 physical function and has a very poor prognosis.(1) Many people with MND (pwMND)  
4 experience depression.(2-4) Anxiety is prevalent around the time of diagnosis(5, 6) and  
5 during the final stages.(7) PwMND also experience other forms of emotional distress besides  
6 anxiety and depression including feelings of hopelessness(8-10) and demoralization.(2)  
7 Emotions are also affected by low self-esteem,(4, 11) end of life concerns,(8) faith/existential  
8 concerns,(12, 13) sense of loss,(13, 14) and changes in identity, roles and relationships.(11,  
9 13, 15) We have used the term 'emotional distress' to refer to this broad range of negative  
10 emotional states.

11 Family members or caregivers of pwMND often struggle with the emotional impact and  
12 burden of the disease, and have high rates of psychological morbidity.(16-18) Studies with  
13 caregivers have described the strain from caring tasks, from having to make changes to their  
14 own lives and not having time for themselves.(19-21)

15 Research has attempted to understand more about this experience of distress and factors that  
16 might explain emotional distress or protect against it. Results from these studies show that  
17 psychosocial factors like coping strategies and social support, are more strongly related to  
18 wellbeing and quality of life than demographic and clinical factors.(11, 22, 23) Qualitative  
19 research can be useful for understanding emotional distress and wellbeing because it allows  
20 participants to express their own understandings and experiences without being limited to  
21 concepts pre-determined by the researcher. Qualitative studies have largely explored the  
22 experience and impact of living with MND,(10, 13, 19, 24) which have added to our  
23 understanding of distress in MND. However, most existing qualitative studies have not  
24 specifically focused on the experience of emotional distress and wellbeing. One qualitative

1 study examined the use of metaphors to express emotions,(25) and a small number have  
2 focused on emotions at specific time periods (e.g. during diagnosis or the final stages).(6, 14,  
3 26) Emotional distress at other time points and other issues related to distress and wellbeing  
4 are largely unexplored.

5 This study aims to fill these gaps and build on our understanding of emotional distress and  
6 wellbeing in MND. More importantly, we aim to hear from people whose experiences are not  
7 well represented in research, including people with speech difficulties and cognitive  
8 impairment. Recent articles have highlighted that there are few effective psychological  
9 interventions to improve wellbeing,(27) and more interventions are needed.(17) This study is  
10 part of a project to develop an intervention to improve emotional wellbeing among pwMND  
11 and caregivers.

12 In this current study, we aim to explore the emotional impact of living with MND, and what  
13 impacts experiences of emotional distress and wellbeing among pwMND and their family  
14 caregivers.

15  
16

## 1       2 3       1   **METHODS**

### 4 5 6       2   **Design**

7  
8       3   Qualitative study using in-depth semi-structured interviews and reflexive thematic analysis,  
9  
10      4   in line with an interpretivist approach. The paper is reported in accordance with the  
11  
12      5   Consolidated criteria for reporting qualitative research (COREQ) (see Supplementary file  
13  
14      6   2).(28)

### 15 16 17      7   **Participants**

18  
19      8   We aimed to recruit 20-30 pwMND and used purposive sampling to represent people with  
20  
21      9   difficulties with movement, speech and cognition, and different lengths of time since  
22  
23     10   diagnosis. Caregiver participants had fewer sampling criteria (age, gender), therefore we  
24  
25     11   aimed to recruit 10-15 caregivers.

26  
27  
28     12   Eligibility: Participants were above 18 years of age, had an MND diagnosis, and had mental  
29  
30     13   capacity to consider participation in the study (assessed by the researcher through  
31  
32     14   correspondence about the study). We included participants who self-reported difficulties with  
33  
34     15   cognition, but had mental capacity to give informed consent, as the views of pwMND who  
35  
36     16   have cognitive impairment have been underrepresented in previous research. We included  
37  
38     17   caregivers above 18 years of age, both current and recently bereaved (bereavement within 1  
39  
40     18   year from the time of the interview).  
41  
42  
43  
44

### 45 46 47     20   **Data collection**

48  
49     21   Participants were recruited through a UK charity that supports pwMND and their families  
50  
51     22   (Motor Neurone Disease Association). Study information was circulated via the charity's  
52  
53     23   website, newsletters, social media outlets and local support groups. People willing to take  
54  
55     24   part contacted CP, who screened for eligibility and provided further details about the  
56  
57     25   interview.  
58  
59  
60

1  
2  
3 1  
4  
5 2 Before each interview, participants gave written informed consent and filled a  
6  
7 3 demographic/clinical details form. This process was completed either in-person, by post or  
8  
9 4 email, based on the interview mode. CP, who has training and experience in conducting  
10  
11 5 interviews for qualitative research, conducted all interviews. Interview mode was flexible  
12  
13 6 (face-to-face, email or phone) to account for various levels of disability. Face-to-face  
14  
15 7 interviews were conducted in a place convenient to participants, usually at home or a hospice.  
16  
17 8 Where two members of a couple had both consented to participate participants were  
18  
19 9 interviewed separately where possible, but jointly where this was requested. The interview  
20  
21 10 topic guide was developed iteratively by CP, LD, AG and patient and public involvement  
22  
23 11 members. In line with an interpretivist approach, questions were broad and open-ended;  
24  
25 12 follow-up questions were led by participants' responses. The final interview topic guide  
26  
27 13 (Supplementary file 1) covered questions about people's experiences living with MND, with  
28  
29 14 a focus on their thoughts and feelings and coping with emotional concerns.  
30  
31  
32  
33  
34  
35  
36  
37

## 38 **Data analysis**

39  
40 17 Face-to-face and phone interviews were audio recorded and transcribed, and all interviews  
41  
42 18 were anonymized. Field notes were completed after each interview, reflecting on  
43  
44 19 participants' responses, interview method and procedure. Data were analyzed using reflexive  
45  
46 20 thematic analysis,(29, 30) as this was a flexible method that suited the research question,  
47  
48 21 helped us identify common patterns across participants' experiences and allowed us to look  
49  
50 22 for underlying meaning behind experiences of emotional distress and wellbeing. In line with  
51  
52 23 an interpretivist approach, we used an inductive approach to data analysis, and included  
53  
54 24 convergent and divergent cases in theme development. The analysis was mainly conducted  
55  
56 25 by CP, who first familiarised herself with interview transcripts, and used Nvivo 12 to code  
57  
58  
59  
60

1 the data inductively. The codes went through several iterations as new interviews were coded  
2 and notes were made about interesting features of the data. Similar codes about emotional  
3 distress and emotional wellbeing were grouped together and candidate themes were  
4 generated. Themes were then reviewed, theme names were revised and findings written up.  
5 This was an iterative process whereby descriptions were clarified and overlap between  
6 themes identified. CP had regular meetings with qualitative research experts LD and AG who  
7 helped refine codes and themes. A lay summary of the findings was sent to all participants.

## 9 **Ethics**

10 We obtained ethics from the University of Southampton ethics committee (ERGOII-46996).  
11 Written informed consent was obtained for all participants. Participants were debriefed and  
12 steps were taken following each interview to ensure participants were not distressed.

## 14 **Patient and Public Involvement (PPI)**

15 Three PPI members (one person with MND and 2 former caregivers) contributed to this  
16 study. They were involved in the recruitment stage to help identify potential participants.  
17 They also helped pilot the interview topic guide, refine interview questions and trial the data  
18 collection procedure to ensure that it was not burdensome. Some PPI members looked over  
19 early drafts of the findings and gave feedback for the reporting of the results.

## 21 **RESULTS**

22 Participants were 25 pwMND and 10 family caregivers (see Table 1). 29 interviews were  
23 conducted in total; 6 joint interviews and 23 one-to-one interviews with either the pwMND or

1 caregiver. 14 interviews were conducted face-to-face, 8 via telephone, and 7 via email.

2 Interviews lasted an average of 39.6 minutes.

3 Table 1: Demographic and clinical details of the sample

| <b>Characteristic</b>                                     | <b>People with MND<br/>(n=25)</b> | <b>Caregivers<br/>(n=10)</b> |
|-----------------------------------------------------------|-----------------------------------|------------------------------|
| <b>Age (range 39-80)</b>                                  |                                   |                              |
| 35-50 years                                               | 3                                 | 0                            |
| 51-65 years                                               | 12                                | 4                            |
| 66-80 years                                               | 10                                | 6                            |
| <b>Gender</b>                                             |                                   |                              |
| Male                                                      | 15                                | 5                            |
| Female                                                    | 10                                | 5                            |
| <b>Relationship to person with MND</b>                    |                                   |                              |
| Spouse/partner                                            |                                   | 10                           |
| <b>Diagnosis</b>                                          |                                   |                              |
| ALS limb                                                  | 18                                |                              |
| ALS bulbar                                                | 1                                 |                              |
| Primary Lateral Sclerosis                                 | 4                                 |                              |
| Progressive Bulbar Palsy                                  | 1                                 |                              |
| Progressive Muscular Atrophy                              | 1                                 |                              |
| <b>Time since diagnosis<br/>(range 2 months-17 years)</b> |                                   |                              |
| Less than 1 year                                          | 8                                 |                              |
| 1-3 years                                                 | 6                                 |                              |



|                                                       |    |
|-------------------------------------------------------|----|
| 3-5 years                                             | 7  |
| More than 5 years                                     | 4  |
| <b>Difficulties reported often/always</b>             |    |
| <b>*(ALSAQ-5 scale)</b>                               |    |
| Difficult to stand up                                 | 16 |
| Difficult to use arms and hands                       | 16 |
| Difficulty eating solid food                          | 4  |
| Speech is not easy to understand                      | 9  |
| Feeling hopeless about the future                     | 3  |
| <b>Self-reported concerns about cognitive ability</b> | 2  |

\*Amyotrophic Lateral Sclerosis Assessment Questionnaire (ALSAQ-5) is a patient self-report questionnaire used to briefly measure the impact of ALS/MND on patients.(31)

We developed 8 themes and 20 subthemes. The first four themes relate to triggers of emotional distress (Fig 1); the remaining four themes capture strategies to improve emotional wellbeing (Fig 2). All themes were present in some degree and form in both patient and caregiver interviews; where differences between these groups were apparent, they are described.

[Insert Fig 1 here]

### **Triggers of emotional distress**

Participants described 4 main triggers of emotional distress and how they had an impact on emotions (themes are numbered, *subthemes in italics*).



1  
2  
3 1  
4  
5 2 “It’s emotionally difficult not being able to physically help my son or my  
6  
7  
8 3 parents and siblings and friends. Not being able to hold and play with my  
9  
10 4 nephew.” (Person with MND, P26)  
11  
12 5

13  
14 6 Participants also had *practical concerns or worries about managing tasks* as a result of losing  
15  
16  
17 7 more ability and function.  
18

19 8 “My main worry at the moment really is moving him from there to there  
20  
21 because his knees and lower legs are getting weaker and I’ve got that [points  
22  
23  
24 10 to hoist] to move him.” (Caregiver, C03)  
25  
26 11

27  
28 12 (2) Having a threatened future  
29

30  
31 13 The short prognosis that accompanies a diagnosis of MND led to feelings of anger,  
32  
33 14 disappointment, sadness and feelings of being robbed/cheated of a future (*threat to life*  
34  
35 15 *narrative and future plans*).  
36  
37

38 16  
39  
40 17 “But I’m having to accept I might have a lonely old age. Disappointment,  
41  
42 18 more than anything else.’ (Caregiver, C27)  
43  
44  
45 19

46  
47 20 Participants also described emotional distress when *anticipating future symptoms or disease*  
48  
49 21 *progression*. Many things triggered worry about the future including researching MND  
50  
51 22 online, meeting other pwMND, discussions with healthcare professionals and going through  
52  
53 23 symptom checklists. Some participants also spoke about experiencing such worries about the  
54  
55 24 future even if symptoms had not progressed or were relatively stable. This was true  
56  
57  
58  
59  
60

1 particularly just after diagnosis, where worries about the future led to feelings of depression,  
2 low mood and withdrawal from others.

3  
4 “Even though physically, say that first month afterwards, there was almost no  
5 change but my mind’s thinking quite morose almost. You almost think of  
6 death at that point... It’s not even anger at that stage, it’s just hopelessness at  
7 that point because you’re just thinking oh that is it isn’t it? It’s all over.”

8 (Person with MND, P10)

9  
10 The *uncertainty of the disease progression* also caused emotional distress among both  
11 patients and caregivers, because of being unable to manage symptoms or plan for the future.

12  
13 “I think the biggest thing about this is that it’s such an unknown. Because  
14 everybody is different and, who knows how much, how long this disease is  
15 going to affect you. And the uncertainty, for me, it’s very hard to cope with.’

16 (Caregiver, C15)

17  
18 (3) Keeping up with constant and multiple changes

19 Participants discussed how the *timing and relentless nature of changes* in symptoms was  
20 difficult physically and emotionally. As time went on, for some it became easier to fall into a  
21 care routine. However, if deterioration happened quickly, both patient and caregivers  
22 expressed that it was difficult to cope and left them feeling tired, not in control and in need of  
23 respite.

24

1  
2  
3 1 “If something’s difficult, we find a way round it. And by the time we’ve found  
4  
5 2 a way round it, things have moved on again, and it doesn’t work. So that’s  
6  
7 3 very frustrating. And a bit... not depressing... soul destroying, because we’re  
8  
9 4 always playing catch up.” (Person with MND, P24)  
10  
11  
12 5  
13  
14

15 6 Sometimes physical symptoms necessitated *changes in many areas of life*. This included  
16  
17 7 changes to their home, work, social and leisure activities. Both pwMND and caregivers spoke  
18  
19 8 about the effort involved in either living with MND or looking after someone with MND.  
20  
21 9 This sometimes affected thoughts and mood negatively including feelings of frustration,  
22  
23 10 anxiety, tiredness or strain/burden. For example, C03, a caregiver, recalled being upset and  
24  
25 11 needing someone to talk to due to exhaustion from physically moving her spouse; “I used to  
26  
27 12 get so tired that sometimes when he had gone to bed in the evening I did just feel like  
28  
29 13 standing there crying.”  
30  
31  
32  
33 14

#### 35 15 (4) Feeling unsupported by professionals or the care system

36  
37  
38 16 Participants reported feeling distressed when healthcare professionals or the care system did  
39  
40 17 not support their needs. *Infrequent or inefficient care provision* left people feeling abandoned  
41  
42 18 and left on their own to deal with MND. This was felt particularly around diagnosis if there  
43  
44 19 was a gap between appointments or no follow up support, leaving pwMND and families on  
45  
46 20 their own to cope with the shock, questions and feelings of hopelessness that often  
47  
48 21 accompanied receiving an MND diagnosis.  
49  
50  
51  
52 22

53  
54 23 “I felt completely unsupported by the neurologist or the health service, we  
55  
56 24 were really just left on our own, completely in the dark as to what was gonna  
57  
58 25 happen... So, it was a very, very distressing time.” (Person with MND, P14)  
59  
60

1  
2  
3 1  
4  
5 2 Poor coordination between different professionals/organizations, difficulty accessing  
6  
7  
8 3 equipment and financial benefits also triggered feelings of frustration, injustice and being ‘let  
9  
10 4 down’ by the system, especially if participants didn’t know where to go for support or if they  
11  
12 5 had to struggle/fight to get the right support.  
13  
14  
15 6

16  
17 7 *Poor or insensitive communication from healthcare professionals* added to emotional  
18  
19 8 distress. In particular, participants described upset when professionals were not sensitive to  
20  
21 9 individual’s preferences for receiving information, did not show empathy for the devastating  
22  
23 10 impact of the disease/diagnosis for pwMND and caregivers, and when only decline was  
24  
25 11 highlighted without presenting avenues for support.  
26  
27  
28 12

29  
30  
31 13 “Our life was shattered in 2 minutes. And I felt that was cruel, very very cruel  
32  
33 14 [pause]. There should be a way of discussing it with you and saying “well  
34  
35 15 look, you have such and such a condition, but hey, this is what we can do.”  
36  
37 16 Not just you’ve got this and throw you out, and so we had to find our own way  
38  
39 17 round this problem.” (Caregiver, C01)  
40  
41  
42 18  
43  
44 19  
45  
46  
47 20

48  
49  
50  
51  
52  
53  
54  
55  
56  
57  
58  
59  
60

[Insert Fig. 2 here]

## 21 **Strategies used to improve emotional wellbeing**

22 Participants described strategies they used to improve emotional wellbeing (themes are  
23 numbered; *subthemes in italics*).

24

1  
2  
3 1 (1) Finding hope and positivity  
4

5 2 Despite the many losses, participants actively found ways to introduce hope and positivity.  
6

7 3 For many people, acceptance of MND was a gradual, and even once there was acceptance, an  
8  
9 4 attitude of not giving up on life was important (*acceptance and not giving up*).

10  
11  
12  
13 5 “I always wanna think I’ve got options, got somewhere to go because at the  
14  
15 6 point where you think ‘well I’ve got nowhere left to go with this’, that’s when  
16  
17 7 you may sort of deteriorate and let it get the best of you. But I think if you say  
18  
19 8 ‘right there’s this trial, this might happen, I’ll go and see a physio...and just  
20  
21 9 see if that helps me.’ (Person with MND, P18)  
22  
23  
24

25 10

26  
27 11 For some, not giving up included hoping for a cure or trying alternative therapies. For others,  
28  
29 12 not giving up included finding solutions to make life easier, and not letting MND define them  
30  
31 13 as they continued normal and valued activities. This strategy was endorsed mainly by  
32  
33 14 pwMND.  
34  
35

36  
37 15 “not giving up, not allowing it to put you away in a corner somewhere,  
38  
39 16 waiting for the inevitable...not allowing that to define what you do with  
40  
41 17 whatever time you have left.” (Person with MND, P06)  
42  
43

44 18

45  
46 19 Despite severe losses of function, many participants continued *doing activities that they*  
47  
48 20 *enjoyed and that were meaningful*. Having things to look forward to in the immediate future  
49  
50 21 added to feelings of hope.  
51  
52

53 22

54  
55 23 “Key thing is to have lots of little goals, lots of little hopes of things to do,  
56  
57 24 normalities, weekends away, holidays but not in the far future. Everything’s in  
58  
59 25 a couple of weeks, 2-3 weeks, something to look forward to... it keeps the  
60

1  
2  
3 1 mind occupied to know that there is something coming up.” (Person with  
4  
5 2 MND, P10)  
6  
7  
8 3  
9

10 4 Most participants tried to *focus on the positive aspects of life*. This strategy became difficult  
11  
12 5 in the context of increasing loss, but participants still stressed that it was important.  
13  
14 6  
15  
16 7

17 8 “I’m very much sort of an optimist. You can’t...you know, because it’s  
18  
19 9 horrible we know that. But we just make [name of pwMND] as comfortable as  
20  
21 10 possible. You’ve got to be positive, otherwise you just sink and go under.”  
22  
23  
24  
25 11 (Caregiver, C07)  
26  
27  
28 12

29  
30 13 To stay positive and deal with negative emotions, participants tried to reframe difficult  
31  
32 14 situations by focusing on what they still can do, using humour, feeling grateful for symptoms  
33  
34 15 they did not have or feeling lucky because of their circumstances or because of the support  
35  
36 16 they received.  
37  
38  
39 17

## 40 41 18 (2) Exerting some control

42  
43  
44 19 When MND took some control away, participants found other ways to exert control over  
45  
46 20 their lives. Although a sense of control was important for most participants, they exerted this  
47  
48 21 control in very different ways. One way was by *focusing on the present moment* and making  
49  
50 22 the most of what they could currently do. This strategy was adopted mainly by pwMND; it  
51  
52 23 stopped them from worrying about the future or feeling sad for what they could no longer do,  
53  
54 24 and instead had a more positive impact on emotions.  
55  
56  
57  
58 25  
59  
60



1  
2  
3 1 “I realised there’s absolutely no point in dwelling on the past because there’s  
4  
5 2 absolutely nothing I can do to get that back... and there’s no point in worrying  
6  
7 3 about the future because there’s absolutely nothing I can do about it. So, what  
8  
9 4 I kind of taught myself to do is try to live in here and now because I do have  
10  
11 5 some control over that.” (Person with MND, P04)  
12  
13 6  
14  
15  
16

17 7 Some participants described how it was helpful to exert *control over decisions about their*  
18  
19 8 *care*, organizing or planning care and taking a more active problem-solving approach. This  
20  
21 9 gave people a sense of empowerment and sense of autonomy, when they would otherwise be  
22  
23 10 struggling to cope.  
24  
25  
26  
27  
28

29 12 “I hate the fact that I can’t talk. Although I can talk, but it’s a bit drained and  
30  
31 13 doesn’t sound like me. But I’ve done voice banking and I think you’ve got to  
32  
33 14 be a step ahead.” (Person with MND, P19)  
34  
35  
36  
37

38 16 ‘they’re [professionals] pretty good at picking up what might be the next thing  
39  
40 17 that’s necessary or how tired I’m looking and dropping in a suggestion here  
41  
42 18 and there about what you might change, what you might need next... in terms  
43  
44 19 of future proofing, so you’re on top of a problem and not floundering about  
45  
46 20 solving it.’ (Caregiver, C05)  
47  
48  
49  
50  
51

52 22 However, some people exerted control by avoiding interactions or information that might  
53  
54 23 remind them of future symptoms or deterioration and associated negative emotions.  
55  
56  
57  
58  
59  
60

1  
2  
3 1 “Everyone’s different, aren’t they? And their MND is different. Some people  
4  
5 2 like to know the ins and out, but I don’t know, I like to bury my head in the  
6  
7 sand. Because I know that I would sit and worry about it all the time. And I  
8 3  
9 don’t want to.” (Person with MND, P24)  
10 4  
11  
12 5  
13  
14

### 15 6 (3) Being kinder to oneself

16  
17 7 This strategy was mentioned by both pwMND and caregivers but for different kinds of tasks.  
18  
19 8 Living with MND was often described as overwhelming and participants expressed the need  
20  
21 9 for *taking a break* from MND. Caregivers spoke about the need to take a physical break from  
22  
23 MND care; while pwMND spoke about taking a break from MND by doing normal activities  
24 10  
25 and not thinking about MND.  
26  
27 11  
28  
29 12  
30

31 13 “I’ll have days where I deliberately avoid looking at anything and trying just  
32  
33 14 to have days or a couple of days where I don’t think about MND.” (Person  
34  
35 with MND, P18)  
36 15  
37  
38 16

39  
40 17 Some participants also expressed the need to give themselves *time and space to adjust to*  
41  
42 18 *changes* in symptoms. This was done by allowing themselves space to vent if they felt  
43  
44 19 overwhelmed, pacing their activities, lowering expectations, modifying how tasks were done,  
45  
46 20 or asking for help.  
47  
48 21  
49

50  
51  
52 22 “Keep doing the things you enjoy, just lower your expectations and standards  
53  
54 23 so you achieve and don’t feel disappointed.” (Person with MND, P21)  
55  
56 24

### 57 25 (4) Experiencing support from others

1  
2  
3 1 *Support from people in a similar situation* Participants valued support from other people  
4  
5 2 with MND and caregivers because they felt truly understood, less alone, and learned of  
6  
7 3 practical solutions to cope with disability. Some participants found it difficult to meet  
8  
9 4 other people with MND, but once they felt ready to do so, they found this to be a positive  
10  
11 5 experience.  
12  
13  
14  
15  
16

17 7 “When you’re still ambulant and not in a wheelchair, it’s a bit scary meeting  
18  
19 8 other people that are a little bit further along the road. But actually we gained  
20  
21 9 a lot of strength from those people.” (Caregiver, C05)  
22  
23  
24  
25  
26  
27

28 12 *Sensitive and supportive communication from healthcare professionals* gave pwMND and  
29  
30 13 families some comfort. This included providing information based on the patient and  
31  
32 14 families’ readiness, communicating information in a sensitive and empathic manner, and  
33  
34 15 focusing on what can be done in terms of care.  
35  
36  
37  
38  
39

40 17 “She delivered the diagnosis, she didn’t give me a prognosis, how long I might  
41  
42 18 have, which I was grateful for in a way because we didn’t ask for it. She just  
43  
44 19 said it’s a life-limiting disease.” (Person with MND, P06)  
45  
46  
47  
48

49 21 *Timely provision and availability of support* was also important with changing symptoms and  
50  
51 22 needs. Having a multidisciplinary care team and specialist support who knew about MND  
52  
53 23 specific problems and solutions had a positive impact on pwMND and families. Participants  
54  
55 24 valued well-coordinated care and professionals who anticipated their support needs.  
56  
57  
58  
59  
60

1  
2  
3 1 “I would also mention my occupational therapist who has been brilliant at  
4  
5 2 assessing my needs and getting in equipment quickly, usually just before they  
6  
7 3 were needed. This has given me more confidence in the care and support I am  
8  
9  
10 4 given.” (Person with MND, P22)  
11  
12  
13  
14  
15  
16  
17  
18  
19  
20  
21  
22  
23  
24  
25  
26  
27  
28  
29  
30  
31  
32  
33  
34  
35  
36  
37  
38  
39  
40  
41  
42  
43  
44  
45  
46  
47  
48  
49  
50  
51  
52  
53  
54  
55  
56  
57  
58  
59  
60

For peer review only

## 1 DISCUSSION

2 This study provides an in-depth understanding of the experience of emotional distress and  
3 emotional wellbeing among people with MND and their caregivers. Our findings come from  
4 a diverse sample, thereby highlighting key triggers of distress and coping strategies used by  
5 people with different abilities, symptoms and at different stages of having MND. PwMND  
6 and caregivers use coping strategies differently but still rely on similar concepts (hope,  
7 positivity, control, self-kindness, social support) to improve emotional wellbeing.

8  
9 Some of our findings are in line with previous MND research, such as the distress caused by  
10 loss of ability and threats to the future.(10, 14, 15, 32) We also know that distress can be  
11 caused through not receiving appropriate professional support.(6, 7, 26, 33) We highlight the  
12 emotional distress triggered by multiple and constant changes brought about by disease  
13 progression and constantly ‘playing catch up.’ This is a new finding in terms of emotional  
14 distress for pwMND, but has been described in the literature around caregiver  
15 experience;(34-36). This finding is important for intervention development, and we need to  
16 ensure that interventions are perceived as manageable, not burdensome.

17  
18 Coping strategies are important for emotional wellbeing,(23, 37, 38) and hope and control are  
19 particularly important for MND.(10, 32, 39-41) Soundy and Condon (2015) show how  
20 concepts of hope and control are linked to each other, and can affect mental wellbeing in  
21 MND.(10) Our findings highlight the complexities of using hope and control in a disease  
22 where this is constantly being threatened, and provide examples of how pwMND and  
23 caregivers use hope and control to improve wellbeing. For example, we found that many  
24 people use meaning-based coping strategies (finding hope and positivity in the face of  
25 difficult circumstances and reappraising them in a positive way), which generates positive

1 affect and helps people make sense of what is happening in the context of goals that may be  
2 untenable.(42) Our findings also show how control is exerted differently in the face of loss,  
3 by focusing more on the present moment, or by making decisions about receiving  
4 information and care. This has implications for support services, especially in providing  
5 options for care, equipment and communication aids.(43) With MND, thinking about the  
6 future can be distressing, but not planning for the future and not having the right support to  
7 manage symptoms can also be distressing. This can be complicated for services to tailor  
8 support based on individual's level of readiness, but support, including psychological  
9 support, needs to be flexible to meet this variability in need.(44) Our findings also point to  
10 the potential usefulness of mindfulness-based and compassion-focused therapy for pwMND  
11 and their caregivers.

## 12 **Strengths and Limitations**

13 We aimed to recruit a diverse range of participants and succeeded in sampling people with  
14 different symptoms of varying severities, particularly people with difficulties speaking.  
15 However, we did not manage to recruit many people with mild cognitive impairment and  
16 could have benefitted from a more targeted sampling approach. Distress and coping strategies  
17 may be very different for people with cognitive impairment and findings need to be applied  
18 bearing this in mind.

## 19 **Conclusion**

20 We provide an in-depth and consolidated understanding of what impacts emotional distress  
21 and wellbeing among pwMND and their caregivers. Findings have important implications for  
22 psychological interventions, services and professionals that support pwMND and their  
23 families. Any communication and support provided for pwMND and their caregivers, needs  
24 to pay attention to concepts of hope, control, and compassion.

1  
2  
3 **1 Funding statement:**  
4

5  
6 2 This work was supported by the Motor Neurone Disease Association, UK under Grant  
7  
8 3 [Yardley/May17/891-792].  
9

10  
11  
12  
13  
14 **5 Competing interest statement:**  
15

16  
17 6 The authors report no conflict of interest.  
18  
19  
20  
21

22 **8 Data availability statement:**  
23

24 9 Anonymised interview transcripts can be made available upon reasonable request from the  
25  
26  
27 10 corresponding author Cathryn Pinto ([C.L.Pinto@soton.ac.uk](mailto:C.L.Pinto@soton.ac.uk)).  
28  
29

30 **11 Author contributions:**  
31

32 12 Cathryn Pinto: Main contributor to the design of the study, ethics application, recruitment and  
33  
34 13 data collection, data analysis, reporting and publication of findings.  
35  
36  
37  
38

39 15 Dr. Adam Geraghty: Involved in obtaining funding for the study, contributed to the study  
40  
41 16 design, supervised Cathryn during recruitment, data collection and data analysis, and  
42  
43  
44 17 contributed to the reporting and publication of findings.  
45  
46  
47

48 19 Prof. Lucy Yardley: Involved in obtaining funding for the study, contributed to the study  
49  
50 20 design and the reporting and publication of findings.  
51  
52  
53

54  
55 22 Dr. Laura Dennison: Involved in obtaining funding for the study, contributed to the study  
56  
57 23 design, supervised Cathryn during recruitment, data collection and data analysis, and  
58  
59  
60 24 contributed to the reporting and publication of findings.

## 1 References

1. Moore C, McDermott CJ, Shaw PJ. Clinical aspects of motor neurone disease. *Medicine*. 2008;36(12):640-5.
2. Clarke DM, McLeod JE, Smith GC, Trauer T, Kissane DW. A comparison of psychosocial and physical functioning in patients with motor neurone disease and metastatic cancer. *Journal of palliative care*. 2005;21(3):173-9.
3. Goldstein LH, Adamson M, Jeffrey L, Down K, Barby T, Wilson C, et al. The psychological impact of MND on patients and carers. *Journal of the Neurological Sciences*. 1998;160:S114-S21.
4. Hogg K, Goldstein LH, Leigh P. The psychological impact of motor neurone disease. *Psychological medicine*. 1994;24(3):625-32.
5. O'Brien MR, Whitehead B, Jack BA, Mitchell JD. From symptom onset to a diagnosis of amyotrophic lateral sclerosis/motor neuron disease (ALS/MND): experiences of people with ALS/MND and family carers—a qualitative study. *Amyotrophic lateral sclerosis*. 2011;12(2):97-104.
6. Pavey A, Allen-Collinson J, Pavey T. The lived experience of diagnosis delivery in motor neurone disease: a sociological-phenomenological study. *Sociological research online*. 2013;18(2):36-47.
7. O'Brien MR, Whitehead B, Jack BA, Mitchell JD. The need for support services for family carers of people with motor neurone disease (MND): views of current and former family caregivers a qualitative study. *Disability and rehabilitation*. 2012;34(3):247-56.
8. Averill AJ, Kasarskis EJ, Segerstrom SC. Psychological health in patients with amyotrophic lateral sclerosis. *Amyotrophic Lateral Sclerosis*. 2007;8(4):243-54.
9. McLeod JE, Clarke DM. A review of psychosocial aspects of motor neurone disease. *Journal of the neurological sciences*. 2007;258(1-2):4-10.
10. Soundy A, Condon N. Patients experiences of maintaining mental well-being and hope within motor neuron disease: a thematic synthesis. *Frontiers in psychology*. 2015;6:606.
11. Goldstein L, Atkins L, Landau S, Brown R, Leigh P. Longitudinal predictors of psychological distress and self-esteem in people with ALS. *Neurology*. 2006;67(9):1652-8.
12. Bolmsjö I. Existential issues in palliative care: interviews of patients with amyotrophic lateral sclerosis. *Journal of palliative medicine*. 2001;4(4):499-505.
13. Foley G, O'Mahony P, Hardiman O. Perceptions of quality of life in people with ALS: effects of coping and health care. *Amyotrophic lateral sclerosis*. 2007;8(3):164-9.
14. Mistry K, Simpson J. Exploring the transitional process from receiving a diagnosis to living with motor neurone disease. *Psychology & health*. 2013;28(8):939-53.
15. Sakellariou D, Boniface G, Brown P. Experiences of living with motor neurone disease: a review of qualitative research. *Disability and rehabilitation*. 2013;35(21):1765-73.
16. Goldstein LH, Leigh PN. Motor neurone disease: a review of its emotional and cognitive consequences for patients and its impact on carers. *British Journal of Health Psychology*. 1999;4(3):193-208.
17. Pagnini F. Psychological wellbeing and quality of life in amyotrophic lateral sclerosis: a review. *International Journal of Psychology*. 2013;48(3):194-205.
18. Rabkin JG, Albert SM, Rowland LP, Mitsumoto H. How common is depression among ALS caregivers? A longitudinal study. *Amyotrophic Lateral Sclerosis*. 2009;10(5-6):448-55.
19. Cox DL. Perspectives of motor neurone disease. *Clinical rehabilitation*. 1992;6(4):333-9.
20. Brown JB. User, carer and professional experiences of care in motor neurone disease. *Primary Health Care Research & Development*. 2003;4(3):207-17.



- 1 21. Olsson Ozanne AG, Strang S, Persson LI. Quality of life, anxiety and depression in  
2 ALS patients and their next of kin. *Journal of clinical nursing*. 2011;20(1-2):283-91.
- 3 22. Goldstein L, Atkins L, Leigh P. Correlates of quality of life in people with motor  
4 neuron disease (MND). *Amyotrophic Lateral Sclerosis and Other Motor Neuron Disorders*.  
5 2002;3(3):123-9.
- 6 23. Matuz T, Birbaumer N, Hautzinger M, Kübler A. Psychosocial adjustment to ALS: a  
7 longitudinal study. *Frontiers in psychology*. 2015;6:1197.
- 8 24. King SJ, Duke MM, O'Connor BA. Living with amyotrophic lateral sclerosis/motor  
9 neurone disease (ALS/MND): decision-making about 'ongoing change and adaptation'.  
10 *Journal of clinical nursing*. 2009;18(5):745-54.
- 11 25. Locock L, Mazanderani F, Powell J. Metaphoric language and the articulation of  
12 emotions by people affected by motor neurone disease. *Chronic illness*. 2012;8(3):201-13.
- 13 26. Whitehead B, O'Brien MR, Jack BA, Mitchell D. Experiences of dying, death and  
14 bereavement in motor neurone disease: a qualitative study. *Palliative Medicine*.  
15 2012;26(4):368-78.
- 16 27. Gould RL, Coulson MC, Brown RG, Goldstein LH, Al-Chalabi A, Howard RJ.  
17 Psychotherapy and pharmacotherapy interventions to reduce distress or improve well-being  
18 in people with amyotrophic lateral sclerosis: A systematic review. *Amyotrophic Lateral  
19 Sclerosis and Frontotemporal Degeneration*. 2015;16(5-6):293-302.
- 20 28. Tong A, Sainsbury P, Craig J. Consolidated criteria for reporting qualitative research  
21 (COREQ): a 32-item checklist for interviews and focus groups. *International journal for  
22 quality in health care*. 2007;19(6):349-57.
- 23 29. Braun V, Clarke V. Using thematic analysis in psychology. *Qualitative research in  
24 psychology*. 2006;3(2):77-101.
- 25 30. Braun V, Clarke V. Reflecting on reflexive thematic analysis. *Qualitative Research in  
26 Sport, Exercise and Health*. 2019;11(4):589-97.
- 27 31. Jenkinson C, Fitzpatrick R. Reduced item set for the amyotrophic lateral sclerosis  
28 assessment questionnaire: development and validation of the ALSAQ-5. *Journal of  
29 Neurology, Neurosurgery & Psychiatry*. 2001;70(1):70-3.
- 30 32. Foley G, Timonen V, Hardiman O. Exerting control and adapting to loss in  
31 amyotrophic lateral sclerosis. *Social Science & Medicine*. 2014;101:113-9.
- 32 33. Hugel H, Grundy N, Rigby S, Young CA. How does current care practice influence  
33 the experience of a new diagnosis of motor neuron disease? A qualitative study of current  
34 guidelines-based practice. *Amyotrophic lateral sclerosis*. 2006;7(3):161-6.
- 35 34. Oyebode JR, Smith H-J, Morrison K. The personal experience of partners of  
36 individuals with motor neuron disease. *Amyotrophic Lateral Sclerosis and Frontotemporal  
37 Degeneration*. 2013;14(1):39-43.
- 38 35. Galvin M, Corr B, Madden C, Mays I, McQuillan R, Timonen V, et al. Caregiving in  
39 ALS—a mixed methods approach to the study of burden. *BMC palliative care*. 2016;15(1):81.
- 40 36. Aoun SM, Bentley B, Funk L, Toye C, Grande G, Stajduhar KJ. A 10-year literature  
41 review of family caregiving for motor neurone disease: moving from caregiver burden  
42 studies to palliative care interventions. *Palliative medicine*. 2013;27(5):437-46.
- 43 37. Larsson BJ, Nordin K, Nygren I. Coping with amyotrophic lateral sclerosis; from  
44 diagnosis and during disease progression. *Journal of the neurological sciences*.  
45 2016;361:235-42.
- 46 38. Jakobsson Larsson B, Nordin K, Askmark H, Nygren I. Coping strategies among  
47 patients with newly diagnosed amyotrophic lateral sclerosis. *Journal of clinical nursing*.  
48 2014;23(21-22):3148-55.

- 1  
2  
3 1 39. Fanos JH, Gelinas DF, Foster RS, Postone N, Miller RG. Hope in palliative care:  
4 2 from narcissism to self-transcendence in amyotrophic lateral sclerosis. *Journal of Palliative*  
5 3 *Medicine*. 2008;11(3):470-5.  
6 4 40. Foley G, Timonen V, Hardiman O. Understanding psycho-social processes  
7 5 underpinning engagement with services in motor neurone disease: a qualitative study.  
8 6 *Palliative medicine*. 2014;28(4):318-25.  
9 7 41. Holkham L, Soundy A. The experience of informal caregivers of patients with motor  
10 8 neurone disease: a thematic synthesis. *Palliative & supportive care*. 2018;16(4):487-96.  
11 9 42. Folkman S, Greer S. Promoting psychological well-being in the face of serious  
12 10 illness: when theory, research and practice inform each other. *Psycho-Oncology: Journal of*  
13 11 *the Psychological, Social and Behavioral Dimensions of Cancer*. 2000;9(1):11-9.  
14 12 43. Pavey A, Warren N, Allen-Collinson J. "It gives me my freedom": Technology and  
15 13 responding to bodily limitations in motor neuron disease. *Medical anthropology*.  
16 14 2015;34(5):442-55.  
17 15 44. Weeks KR, Gould RL, Mcdermott C, Lynch J, Goldstein LH, Graham CD, et al.  
18 16 Needs and preferences for psychological interventions of people with motor neuron disease.  
19 17 *Amyotrophic lateral sclerosis and frontotemporal degeneration*. 2019;20(7-8):521-31.  
20  
21  
22  
23  
24  
25  
26  
27  
28  
29  
30  
31  
32  
33  
34  
35  
36  
37  
38  
39  
40  
41  
42  
43  
44  
45  
46  
47  
48  
49  
50  
51  
52  
53  
54  
55  
56  
57  
58  
59  
60

1  
2  
3  
4  
5  
6  
7  
8  
9  
10  
11  
12  
13  
14  
15  
16  
17  
18  
19  
20  
21  
22  
23  
24  
25  
26  
27  
28  
29  
30  
31  
32  
33  
34  
35  
36  
37  
38  
39  
40  
41  
42  
43  
44  
45  
46  
47  
48  
49  
50  
51  
52  
53  
54  
55  
56  
57  
58  
59  
60

1 Figure 1. Triggers of emotional distress

2

3 Figure 2. Strategies used to improve emotional wellbeing

4

For peer review only



Figure 1. Triggers of emotional distress

167x94mm (300 x 300 DPI)

1  
2  
3  
4  
5  
6  
7  
8  
9  
10  
11  
12  
13  
14  
15  
16  
17  
18  
19  
20  
21  
22  
23  
24  
25  
26  
27  
28  
29  
30  
31  
32  
33  
34  
35  
36  
37  
38  
39  
40  
41  
42  
43  
44  
45  
46  
47  
48  
49  
50  
51  
52  
53  
54  
55  
56  
57  
58  
59  
60



Figure 2. Strategies used to improve emotional wellbeing

427x236mm (96 x 96 DPI)

## SUPPLEMENTARY FILE 1

### 1. Interview topic guide

- (1) Can you tell me about your experience with MND?
  - wherever the participant would like to start, could be about diagnosis or their experience now.
  - Have your thoughts and feelings changed since you were diagnosed or are they the same? (If different, in what way have they changed?)
- (2) What's it like to live with MND? Can you tell me a bit more about that?
  - What are your main concerns/worries/emotions you face on a day to day basis?
  - What are your thoughts and feelings about living with MND?
- (3) Can you tell me about how you manage MND on a daily basis? If you find yourself having emotional concerns or worries, do you have any ways of managing them?
- (4) Can you tell me about any support you feel you have? Or people/ things/ processes that have helped you?
- (5) (In addition to this support) Do you have any thoughts about what else might support you to cope with MND?

1  
2  
3  
4  
5  
6  
7  
8  
9  
10  
11  
12  
13  
14  
15  
16  
17  
18  
19  
20  
21  
22  
23  
24  
25  
26  
27  
28  
29  
30  
31  
32  
33  
34  
35  
36  
37  
38  
39  
40  
41  
42  
43  
44  
45  
46  
47  
48  
49  
50  
51  
52  
53  
54  
55  
56  
57  
58  
59  
60

- particularly additional support with any emotional concerns/worries that participants have previously mentioned.

For peer review only

1  
2  
3  
4  
5 **SUPPLEMENTARY FILE 2**  
6  
7

8 **2. Consolidated criteria for reporting qualitative studies (COREQ):**  
9

10  
11 Tong A, Sainsbury P, Craig J. Consolidated criteria for reporting qualitative research  
12 (COREQ): a 32-item checklist for interviews and focus groups. *International Journal for*  
13 *Quality in Health Care*. 2007. Volume 19, Number 6: pp. 349 – 357  
14  
15  
16

17  
18  
19  
20  
21  
22  
23  
24  
25  
26  
27  
28  
29  
30  
31  
32  
33  
34  
35  
36  
37  
38  
39  
40  
41  
42  
43  
44  
45  
46  
47  
48  
49  
50  
51  
52  
53  
54  
55  
56  
57

| No. Item                                       | Guide questions/description                                                                              | Reported on Page #                                                                                                                                                                                                                                   |
|------------------------------------------------|----------------------------------------------------------------------------------------------------------|------------------------------------------------------------------------------------------------------------------------------------------------------------------------------------------------------------------------------------------------------|
| <b>Domain 1: Research team and reflexivity</b> |                                                                                                          |                                                                                                                                                                                                                                                      |
| <i>Personal Characteristics</i>                |                                                                                                          |                                                                                                                                                                                                                                                      |
| 1. Interviewer/facilitator                     | Which author/s conducted the interview or focus group?                                                   | CP – Methods section                                                                                                                                                                                                                                 |
| 2. Credentials                                 | What were the researcher's credentials? E.g. PhD, MD                                                     | PhD student – Methods section                                                                                                                                                                                                                        |
| 3. Occupation                                  | What was their occupation at the time of the study?                                                      | PhD student – Methods section                                                                                                                                                                                                                        |
| 4. Gender                                      | Was the researcher male or female?                                                                       | Female                                                                                                                                                                                                                                               |
| 5. Experience and training                     | What experience or training did the researcher have?                                                     | Methods section                                                                                                                                                                                                                                      |
| <i>Relationship with participants</i>          |                                                                                                          |                                                                                                                                                                                                                                                      |
| 6. Relationship established                    | Was a relationship established prior to study commencement?                                              | No                                                                                                                                                                                                                                                   |
| 7. Participant knowledge of the interviewer    | What did the participants know about the researcher? e.g. personal goals, reasons for doing the research | Participants knew that the researcher was a PhD student at the University of Southampton, doing her PhD on emotional distress and wellbeing in Motor Neurone Disease (MND). This information was described on the participant information sheets and |



|                                          |                                                                                                                                                             |                                                                                                                                                                                |
|------------------------------------------|-------------------------------------------------------------------------------------------------------------------------------------------------------------|--------------------------------------------------------------------------------------------------------------------------------------------------------------------------------|
|                                          |                                                                                                                                                             | study adverts.                                                                                                                                                                 |
| 8. Interviewer characteristics           | What characteristics were reported about the interviewer/facilitator?<br>e.g. Bias, assumptions, reasons and interests in the research topic                | The interviewer did not have much prior knowledge of MND, but had previously worked with and interviewed people with Parkinson's disease and people receiving palliative care. |
| <b>Domain 2: study design</b>            |                                                                                                                                                             |                                                                                                                                                                                |
| <i>Theoretical framework</i>             |                                                                                                                                                             |                                                                                                                                                                                |
| 9. Methodological orientation and Theory | What methodological orientation was stated to underpin the study?<br>e.g. grounded theory, discourse analysis, ethnography, phenomenology, content analysis | The study used methods (in-depth semi-structured interviews and reflexive thematic analysis) in line with an interpretivist approach.                                          |
| <i>Participant selection</i>             |                                                                                                                                                             |                                                                                                                                                                                |
| 10. Sampling                             | How were participants selected?<br>e.g. purposive, convenience, consecutive, snowball                                                                       | Purposive sampling –<br>Methods section                                                                                                                                        |
| 11. Method of approach                   | How were participants approached? e.g. face-to-face, telephone, mail, email                                                                                 | Methods section                                                                                                                                                                |
| 12. Sample size                          | How many participants were in the study?                                                                                                                    | Results section                                                                                                                                                                |
| 13. Non-participation                    | How many people refused to participate or dropped out?<br>Reasons?                                                                                          | Participants contacted the research if they wanted to take part in an interview.<br>No one dropped out.                                                                        |
| <i>Setting</i>                           |                                                                                                                                                             |                                                                                                                                                                                |
| 14. Setting of data collection           | Where was the data collected? e.g. home, clinic, workplace                                                                                                  | Methods section                                                                                                                                                                |
| 15. Presence of non-participants         | Was anyone else present besides the participants and researchers?                                                                                           | No                                                                                                                                                                             |
| 16. Description of sample                | What are the important characteristics of the sample? e.g. demographic data, date                                                                           | Results section                                                                                                                                                                |
| <i>Data collection</i>                   |                                                                                                                                                             |                                                                                                                                                                                |
| 17. Interview guide                      | Were questions, prompts, guides                                                                                                                             | Methods section and                                                                                                                                                            |

|                                        |                                                                                                              |                                                                                                                                                        |
|----------------------------------------|--------------------------------------------------------------------------------------------------------------|--------------------------------------------------------------------------------------------------------------------------------------------------------|
|                                        | provided by the authors? Was it pilot tested?                                                                | supplementary file 1                                                                                                                                   |
| 18. Repeat interviews                  | Were repeat interviews carried out? If yes, how many?                                                        | N/A                                                                                                                                                    |
| 19. Audio/visual recording             | Did the research use audio or visual recording to collect the data?                                          | Methods section                                                                                                                                        |
| 20. Field notes                        | Were field notes made during and/or after the interview or focus group?                                      | Field notes were made after each interview.                                                                                                            |
| 21. Duration                           | What was the duration of the interviews or focus group?                                                      | Average duration reported – Results section                                                                                                            |
| 22. Data saturation                    | Was data saturation discussed?                                                                               | No. We were not aiming for theoretical data saturation, but rather to look at patterns of experience across participants with diverse characteristics. |
| 23. Transcripts returned               | Were transcripts returned to participants for comment and/or correction?                                     | No                                                                                                                                                     |
| <b>Domain 3: analysis and findings</b> |                                                                                                              |                                                                                                                                                        |
| <i>Data analysis</i>                   |                                                                                                              |                                                                                                                                                        |
| 24. Number of data coders              | How many data coders coded the data?                                                                         | One – Methods section                                                                                                                                  |
| 25. Description of the coding tree     | Did authors provide a description of the coding tree?                                                        | N/A                                                                                                                                                    |
| 26. Derivation of themes               | Were themes identified in advance or derived from the data?                                                  | Inductive thematic analysis – Methods section                                                                                                          |
| 27. Software                           | What software, if applicable, was used to manage the data?                                                   | NVivo                                                                                                                                                  |
| 28. Participant checking               | Did participants provide feedback on the findings?                                                           | Not participant checking, but a summary of findings was sent to all participants.                                                                      |
| <i>Reporting</i>                       |                                                                                                              |                                                                                                                                                        |
| 29. Quotations presented               | Were participant quotations presented to illustrate the themes/findings? Was each quotation identified? e.g. | Yes, Results section                                                                                                                                   |

|                                  |                                                                        |                                                                                                |
|----------------------------------|------------------------------------------------------------------------|------------------------------------------------------------------------------------------------|
|                                  | participant number                                                     |                                                                                                |
| 30. Data and findings consistent | Was there consistency between the data presented and the findings?     | Yes, illustrative quotations have been provided for each theme and sub-theme – Results section |
| 31. Clarity of major themes      | Were major themes clearly presented in the findings?                   | Results section and presented in Figures 1 & 2                                                 |
| 32. Clarity of minor themes      | Is there a description of diverse cases or discussion of minor themes? | Description of diverse cases embedded within the explanation of themes – Results section       |

# BMJ Open

## Emotional distress and wellbeing among people with Motor Neurone Disease (MND) and their family caregivers: a qualitative interview study

|                                 |                                                                                                                                                                                                                                                                                                  |
|---------------------------------|--------------------------------------------------------------------------------------------------------------------------------------------------------------------------------------------------------------------------------------------------------------------------------------------------|
| Journal:                        | <i>BMJ Open</i>                                                                                                                                                                                                                                                                                  |
| Manuscript ID                   | bmjopen-2020-044724.R2                                                                                                                                                                                                                                                                           |
| Article Type:                   | Original research                                                                                                                                                                                                                                                                                |
| Date Submitted by the Author:   | 22-Jun-2021                                                                                                                                                                                                                                                                                      |
| Complete List of Authors:       | Pinto, Cathryn; University of Southampton, Psychology<br>Geraghty, Adam; University of Southampton, Primary Care and Population Sciences<br>Yardley, Lucy; University of Southampton, Psychology; University of Bristol, School of Health Sciences<br>Dennison, Laura; University of Southampton |
| <b>Primary Subject Heading</b>: | Neurology                                                                                                                                                                                                                                                                                        |
| Secondary Subject Heading:      | Qualitative research, Mental health                                                                                                                                                                                                                                                              |
| Keywords:                       | Motor neurone disease < NEUROLOGY, Depression & mood disorders < PSYCHIATRY, Anxiety disorders < PSYCHIATRY, QUALITATIVE RESEARCH                                                                                                                                                                |
|                                 |                                                                                                                                                                                                                                                                                                  |

SCHOLARONE™  
Manuscripts



I, the Submitting Author has the right to grant and does grant on behalf of all authors of the Work (as defined in the below author licence), an exclusive licence and/or a non-exclusive licence for contributions from authors who are: i) UK Crown employees; ii) where BMJ has agreed a CC-BY licence shall apply, and/or iii) in accordance with the terms applicable for US Federal Government officers or employees acting as part of their official duties; on a worldwide, perpetual, irrevocable, royalty-free basis to BMJ Publishing Group Ltd ("BMJ") its licensees and where the relevant Journal is co-owned by BMJ to the co-owners of the Journal, to publish the Work in this journal and any other BMJ products and to exploit all rights, as set out in our [licence](#).

The Submitting Author accepts and understands that any supply made under these terms is made by BMJ to the Submitting Author unless you are acting as an employee on behalf of your employer or a postgraduate student of an affiliated institution which is paying any applicable article publishing charge ("APC") for Open Access articles. Where the Submitting Author wishes to make the Work available on an Open Access basis (and intends to pay the relevant APC), the terms of reuse of such Open Access shall be governed by a Creative Commons licence – details of these licences and which [Creative Commons](#) licence will apply to this Work are set out in our licence referred to above.

Other than as permitted in any relevant BMJ Author's Self Archiving Policies, I confirm this Work has not been accepted for publication elsewhere, is not being considered for publication elsewhere and does not duplicate material already published. I confirm all authors consent to publication of this Work and authorise the granting of this licence.

1  
2  
3 1 **Emotional distress and wellbeing among people with Motor Neurone**  
4  
5  
6 2 **Disease (MND) and their family caregivers: a qualitative interview study**  
7  
8

9  
10 3 Cathryn Pinto,<sup>a\*</sup> Adam W A Geraghty<sup>b</sup>, Lucy Yardley<sup>a,c</sup> and Laura Dennison<sup>a</sup>  
11  
12

13 4  
14  
15  
16 5 *<sup>a</sup>Department of psychology, University of Southampton, Southampton, UK;*  
17  
18

19  
20 6 *<sup>b</sup>Primary care, population sciences and medical education, University of Southampton,*  
21  
22 7 *Southampton, UK;*  
23  
24

25 8 *<sup>c</sup>School of psychological science, University of Bristol, Bristol, UK*  
26  
27

28  
29 9 \*Corresponding author: Cathryn Pinto, University of Southampton, B44 Highfield campus,  
30  
31 10 Southampton SO17 1BJ Email: [C.L.Pinto@soton.ac.uk](mailto:C.L.Pinto@soton.ac.uk)  
32  
33

34 11  
35  
36  
37 12  
38  
39  
40 13 Word count: 3998  
41  
42  
43  
44 14  
45  
46 15  
47  
48  
49  
50  
51  
52  
53  
54  
55  
56  
57  
58  
59  
60

## Abstract

**Objective:** We aimed to get an in-depth understanding of the emotions experienced by people with Motor Neurone Disease (MND) and their caregivers and to explore what impacts emotional distress and wellbeing.

**Design:** Qualitative study using semi-structured interviews with people with MND and caregivers.

**Setting:** Participants were recruited from across the UK and took part in interviews conducted either face-to-face, by telephone or email to accommodate for varying levels of disability.

**Participants:** 25 people with MND and 10 caregivers took part. Participants were purposively sampled based on their MND diagnosis, symptoms and time since diagnosis.

**Data analysis:** Data were analysed using inductive reflexive thematic analysis.

**Results:** Eight broad themes were generated (20 subthemes). Participants described the emotional distress of losing physical function and having a threatened future because of poor prognosis. Keeping up with constant changes in symptoms and feeling unsupported by the healthcare system added to emotional distress. Finding hope and positivity, exerting some control, being kinder to oneself, and experiencing support from others were helpful strategies for emotional wellbeing.

**Conclusion:** The study provides a broad understanding of what impacts emotional distress and wellbeing and discusses implications for psychological interventions for people with MND and caregivers. Any communication and support provided for people with MND and their caregivers, needs to pay attention to concepts of hope, control, and compassion.

1  
2  
3 1 Keywords: Motor neuron disease; emotional distress; wellbeing; depression; qualitative  
4  
5 2 research  
6  
7  
8  
9 3  
10  
11

12 4 **Article summary (Strengths and Limitations):**  
13

- 14 5 • This study provides an in-depth and inclusive account of what impacts emotional  
15 6 distress and wellbeing using interviews with people with MND and their family  
16 7 members.  
17 8 • Purposive sampling and flexible recruitment strategies used to capture experiences of  
18 9 people with MND with a range of symptoms, including written interviews with who  
19 10 had difficulties with speech.  
20 11 • Participants included people who had been recently diagnosed as well as those who  
21 12 had MND for years, and therefore captured experiences of emotional distress and  
22 13 wellbeing at different stages of having MND.  
23 14 • Fewer people with mild cognitive impairment took part in the study.  
24 15 • Study design did not allow us to see changes in emotional of distress and wellbeing  
25 16 over time, as symptoms change and people find new ways to adjust to changes.  
26 17



## 1 INTRODUCTION

2 Motor neurone disease (MND) is a neurodegenerative disease, which results in declining  
3 physical function and has a very poor prognosis.(1) In terms of psychological impact, many  
4 people with MND (pwMND) experience depression.(2-4) Anxiety is prevalent around the  
5 time of diagnosis(5, 6) and during the final stages.(7) PwMND also experience feelings of  
6 hopelessness(8-10) and demoralization.(2)

7 Research has described the impact of the significant losses that come with MND on personal,  
8 social and occupational relationships.(10) Family members or caregivers of pwMND often  
9 struggle with the emotional impact and burden of the disease, and have high rates of  
10 psychological morbidity.(11-13) Studies with caregivers have described the strain from  
11 caring tasks, from having to make changes to their own lives and not having time for  
12 themselves.(14-16) Distress in MND has largely been described as anxiety and depression,(8,  
13 12, 13, 17) or caregiver burden and strain.(18, 19) Wellbeing has largely been described as  
14 reduced anxiety and depression or improvements in quality of life.(20-22) In this paper, we  
15 use the terms ‘emotional distress’ to refer to the broad range of negative or difficult thoughts  
16 and emotions, and ‘emotional wellbeing’ for the broad range of positive or helpful thoughts  
17 and emotions experienced by pwMND and caregivers.

18 Studies have looked at demographic and clinical factors that might explain emotional  
19 distress or protect against it.(22) Results from these studies show that psychosocial factors  
20 like coping strategies and social support, are more strongly related to wellbeing and quality of  
21 life than demographic and clinical factors.(18, 22, 23) Emotions are also affected by low self-  
22 esteem,(4, 18) end of life concerns,(8) faith/existential concerns,(24, 25) sense of loss,(25,  
23 26) and changes in identity, roles and relationships.(18, 25, 27) Psychosocial factors are  
24 clearly important for distress and wellbeing in MND, and we need a better understanding of

1 what influences emotional distress and the use of different coping strategies.(20, 28)

2 Qualitative research can be useful for understanding emotional distress and wellbeing

3 because it allows participants to express their own understandings and experiences without

4 being limited to concepts pre-determined by the researcher. Qualitative studies have largely

5 explored the experience and impact of living with MND(10, 14, 25, 29), which have added to

6 understanding of distress in MND. Few studies have focused specifically on the emotions

7 experienced. One qualitative study examined the use of metaphors to express emotions,(30)

8 and a small number have focused on emotions at specific time periods (e.g. during diagnosis

9 or the final stages).(6, 26, 31) Emotional distress at other time points and things that

10 influence distress and wellbeing need further exploration.

11  
12 This study aims to build on our understanding of emotional distress and wellbeing in MND.

13 More importantly, we aim to hear from people whose experiences are not well represented in

14 research, including people with speech difficulties, cognitive impairment, and people at

15 different stages of the disease. It is particularly timely to do this research because recent

16 articles have highlighted that there are few effective psychological interventions to improve

17 wellbeing,(32) and more research and interventions are needed.(12, 33) This study is part of

18 a larger project to develop an intervention to improve emotional wellbeing among pwMND

19 and caregivers.

20 In this current study, we aim to understand the emotional impact of living with MND and

21 explore what impacts experiences of emotional distress and wellbeing among pwMND and

22 their family caregivers.

23

24

## 1       2 3       1   **METHODS**

### 4       5 6       2   **Design**

7       3   Qualitative study using in-depth semi-structured interviews and reflexive thematic analysis,  
8       4   in line with an interpretivist approach. The paper is reported in accordance with the  
9       5   Consolidated criteria for reporting qualitative research (COREQ) (see Supplementary file  
10      6   1).(34)

### 11      7   **Participants**

12      8   We aimed to recruit 20-30 pWMND and used purposive sampling to represent people with  
13      9   difficulties with movement, speech and cognition, and different lengths of time since  
14      10   diagnosis. Caregiver participants had fewer sampling criteria (age, gender), therefore we  
15      11   aimed to recruit 10-15 caregivers.

16      12   Eligibility: Participants were above 18 years of age, had an MND diagnosis, and had mental  
17      13   capacity to consider participation in the study (assessed by the researcher through  
18      14   correspondence about the study). We included participants who self-reported difficulties with  
19      15   cognition, but had mental capacity to give informed consent, as the views of pWMND who  
20      16   have cognitive impairment have been underrepresented in previous research. We included  
21      17   caregivers above 18 years of age, both current and recently bereaved (bereavement within 1  
22      18   year from the time of the interview).

### 23      19 24      20   **Data collection**

25      21   Participants were recruited through a UK charity that supports pWMND and their families  
26      22   (Motor Neurone Disease Association). Study information was circulated via the charity's  
27      23   website, newsletters, social media outlets and local support groups. People willing to take  
28      24   part contacted CP, who screened for eligibility and provided further details about the  
29      25   interview.

1 Before each interview, participants gave written informed consent and filled a  
2 demographic/clinical details form. This process was completed either in-person, by post or  
3 email, based on the interview mode. CP, who has training and experience in conducting  
4 interviews for qualitative research, conducted all interviews. Interview mode was flexible  
5 (face-to-face, email or phone) to accommodate for various levels of disability. Face-to-face  
6 interviews were conducted in a place convenient to participants, usually at home or a hospice.  
7 Where two members of a couple had both consented to participate participants were  
8 interviewed separately where possible, but jointly where this was requested for reasons of  
9 comfort or to facilitate easier communication. The interview topic guide was developed  
10 iteratively by CP, LD, AG and patient and public involvement members. In line with an  
11 interpretivist approach, questions were broad and open-ended to allow participants to give  
12 rich, in-depth accounts of their emotional experiences in relation to MND, and follow-up  
13 questions were led by participants' responses. The final interview topic guide  
14 (Supplementary file 2) covered questions about people's experiences living with MND, with  
15 a focus on their thoughts and feelings and coping with emotional concerns.

## 17 **Data analysis**

18 Face-to-face and phone interviews were audio recorded and transcribed, and all interviews  
19 were anonymized. Field notes were completed after each interview, reflecting on  
20 participants' responses, and interview method and procedure. Data were analyzed using  
21 reflexive thematic analysis,(35, 36) as this was a flexible method that suited the research  
22 question, helped us identify common patterns across participants' experiences and allowed us  
23 to look for underlying meaning behind experiences of emotional distress and wellbeing. In  
24 line with an interpretivist approach, we used an inductive approach to data analysis, and  
25 included convergent and divergent cases in theme development. The analysis was mainly

1 conducted by CP, a PhD student with previous experience as a qualitative researcher. After  
2 familiarisation with the interview transcripts, Nvivo 12 software was used to code the data  
3 inductively, focusing on semantic and latent features of the data. The codes went through  
4 several iterations as new interviews were coded. During the coding process, notes were made  
5 about interesting features of the data and how different concepts related to each other.  
6 Following this, similar codes about emotional distress and emotional wellbeing were grouped  
7 together and candidate themes were generated. Themes were then reviewed to see if they  
8 represented experiences across the dataset. Theme names were revised and findings written  
9 up; this was also an iterative process whereby descriptions were clarified and overlap  
10 between themes identified. CP had regular meetings with qualitative research experts LD and  
11 AG who helped refine codes and themes. A lay summary of the findings was sent to all  
12 participants.

### 14 **Ethics**

15 We obtained ethics from the University of Southampton ethics committee (ERGOII-46996).  
16 Written informed consent was obtained for all participants. Participants were debriefed and  
17 steps were taken following each interview to ensure participants were not distressed.

### 19 **Patient and Public Involvement (PPI)**

20 Three PPI members (one person with MND and 2 former caregivers) contributed to this  
21 study. They were involved in the recruitment stage to help identify potential participants.  
22 They also helped pilot the interview topic guide, refine interview questions and trial the data  
23 collection procedure to ensure that it was not burdensome. Some PPI members looked over  
24 early drafts of the findings and offered insight about elements to highlight or discuss in the  
25 reporting of the results.

1

2 **RESULTS**

3 Participants were 25 pwMND and 10 family caregivers (see Table 1).

4 29 interviews were conducted in total; 6 joint interviews and 23 one-to-one interviews with  
 5 either pwMND or caregiver . 14 interviews were conducted face-to-face, 8 via telephone, and  
 6 7 via email. Interviews lasted an average of 39.6 minutes.

7 Table 1: Demographic and clinical details of the sample

| <b>Characteristic</b>                  | <b>People with MND<br/>(n=25)</b> | <b>Caregivers<br/>(n=10)</b> |
|----------------------------------------|-----------------------------------|------------------------------|
| <b>Age (range 39-80)</b>               |                                   |                              |
| 35-50 years                            | 3                                 | 0                            |
| 51-65 years                            | 12                                | 4                            |
| 66-80 years                            | 10                                | 6                            |
| <b>Gender</b>                          |                                   |                              |
| Male                                   | 15                                | 5                            |
| Female                                 | 10                                | 5                            |
| <b>Relationship to person with MND</b> |                                   |                              |
| Spouse/partner                         |                                   | 10                           |
| <b>Diagnosis</b>                       |                                   |                              |
| ALS limb                               | 18                                |                              |
| ALS bulbar                             | 1                                 |                              |
| Primary Lateral Sclerosis              | 4                                 |                              |
| Progressive Bulbar Palsy               | 1                                 |                              |

|                                                       |    |
|-------------------------------------------------------|----|
| Progressive Muscular Atrophy                          | 1  |
| <b>Time since diagnosis</b>                           |    |
| <b>(range 2 months-17 years)</b>                      |    |
| Less than 1 year                                      | 8  |
| 1-3 years                                             | 6  |
| 3-5 years                                             | 7  |
| More than 5 years                                     | 4  |
| <b>Difficulties reported often/always</b>             |    |
| <b>*(ALSAQ-5 scale)</b>                               |    |
| Difficult to stand up                                 | 16 |
| Difficult to use arms and hands                       | 16 |
| Difficulty eating solid food                          | 4  |
| Speech is not easy to understand                      | 9  |
| Feeling hopeless about the future                     | 3  |
| <b>Self-reported concerns about cognitive ability</b> |    |
|                                                       | 2  |

\*Amyotrophic Lateral Sclerosis Assessment Questionnaire (ALSAQ-5) is a patient self-report questionnaire used to briefly measure the impact of ALS/MND on patients.(37)

We developed 8 themes and 20 subthemes. The first four themes relate to triggers of emotional distress (Fig 1); the remaining four themes capture strategies to improve emotional wellbeing (Fig 2). All themes were present in some degree and form in both patient and caregiver interviews; where differences between these groups were apparent, they are described.

1 [Insert Fig 1 here]

## 2 **Triggers of emotional distress**

3 Participants described 4 main triggers of emotional distress and how they had an impact on  
4 emotions (themes are numbered, *subthemes in italics*).

### 6 (1) Losing function or ability

7 Most participants described how losing function or ability was distressing because of a  
8 *reduced sense of autonomy and control*. PwMND spoke about feelings of anger, frustration,  
9 sadness or grief at not being able to do the things they wanted to, at losing their independence  
10 and relying on others for help. Caregivers expressed similar emotions at seeing their family  
11 member lose capability and independence.

13 “Hobbies that I had, I can’t pursue any of them because I just don’t have any  
14 capability enough in my arms now to do that. So, I think mentally I’ve seen a  
15 dip in the last six months into a much more kind of negative and angry stage  
16 really.” (Person with MND, P13)

18 “...and seeing him, and it saddened me, where you’re sort of doing the job of  
19 hoisting and moving, the manual handling, and then you step back and you’re  
20 seeing it from a distance, that’s actually quite [pauses] hard as well, because  
21 he’s got no control over his body and he’s having to have people do that for  
22 him.” (Caregiver, C05)



1  
2  
3 1 Losing function led to *changes in self-identity*, specifically those of becoming a ‘patient’ and  
4  
5 2 ‘carer’. These changes, especially losing one’s voice which is strongly linked to identity,  
6  
7 3 were experienced as distressing.  
8  
9

10 4  
11  
12 5 “Losing mobility gradually was bad enough... but losing my voice is much  
13  
14 6 more dreadful. It’s taking away part of my personality. I can no longer  
15  
16 7 express myself properly.” (Person with MND, P21)  
17  
18  
19 8

20  
21  
22 9 Losing function or ability sometimes led to *changes in relationships and interactions*.

23  
24 10 PwMND spoke about negative feelings of becoming a burden for their partner/spouse. Both  
25  
26 11 patient and caregiver participants spoke about how having MND sometimes changed or  
27  
28 12 limited interactions between family members.  
29  
30

31 13  
32  
33 14 “It’s emotionally difficult not being able to physically help my son or my  
34  
35 15 parents and siblings and friends. Not being able to hold and play with my  
36  
37 16 nephew.” (Person with MND, P26)  
38  
39

40 17  
41  
42 18 Participants also had *practical concerns or worries about managing tasks* as a result of losing  
43  
44 19 more ability and function.  
45

46 20 “My main worry at the moment really is moving him from there to there  
47  
48 21 because his knees and lower legs are getting weaker and I’ve got that [points  
49  
50 22 to hoist] to move him.” (Caregiver, C03)  
51  
52  
53 23

54  
55  
56 24 (2) Having a threatened future  
57  
58  
59  
60

1  
2  
3 1 The short prognosis that accompanies a diagnosis of MND led to feelings of anger,  
4  
5 2 disappointment, sadness and feelings of being robbed/cheated of a future (*threat to life*  
6  
7 3 *narrative and future plans*).

8  
9  
10 4  
11  
12 5 “But I’m having to accept I might have a lonely old age. Disappointment,  
13  
14 6 more than anything else.’ (Caregiver, C27)

15  
16  
17 7  
18  
19 8 Participants also described emotional distress when *anticipating future symptoms or disease*  
20  
21 9 *progression*. Many things triggered worry about the future including researching MND  
22  
23  
24 10 online, meeting other pWMND, discussions with healthcare professionals and going through  
25  
26 11 symptom checklists. Some participants also spoke about experiencing such worries about the  
27  
28 12 future even if symptoms had not progressed or were relatively stable. This was true  
29  
30 13 particularly just after diagnosis, where worries about the future led to feelings of depression,  
31  
32 14 low mood and withdrawal from others.

33  
34  
35 15  
36  
37 16 “Even though physically, say that first month afterwards, there was almost no  
38  
39 17 change but my mind’s thinking quite morose almost. You almost think of  
40  
41 18 death at that point... It’s not even anger at that stage, it’s just hopelessness at  
42  
43 19 that point because you’re just thinking oh that is it isn’t it? It’s all over.”  
44  
45  
46 20 (Person with MND, P10)

47  
48  
49 21  
50  
51 22 The *uncertainty of the disease progression* also caused emotional distress among both  
52  
53 23 patients and caregivers, because of being unable to manage symptoms or plan for the future.  
54  
55  
56 24

1  
2  
3 1 “I think the biggest thing about this is that it’s such an unknown. Because  
4  
5 2 everybody is different and, who knows how much, how long this disease is  
6  
7 3 going to affect you. And the uncertainty, for me, it’s very hard to cope with.’  
8  
9  
10 4 (Caregiver, C15)  
11  
12  
13  
14

15 6 (3) Keeping up with constant and multiple changes  
16

17 7 Participants discussed how the *timing and relentless nature of changes* in symptoms was  
18  
19 8 difficult physically and emotionally. As time went on, for some it became easier to fall into a  
20  
21 9 care routine. However, if deterioration happened quickly, both patient and caregivers  
22  
23 10 expressed that it was difficult to cope and left them feeling tired, not in control and in need of  
24  
25 11 respite.  
26  
27  
28  
29  
30

31 13 “If something’s difficult, we find a way round it. And by the time we’ve found  
32  
33 14 a way round it, things have moved on again, and it doesn’t work. So that’s  
34  
35 15 very frustrating. And a bit... not depressing... soul destroying, because we’re  
36  
37 16 always playing catch up.” (Person with MND, P24)  
38  
39  
40  
41  
42

43 18 Sometimes physical symptoms necessitated *changes in many areas of life*. This included  
44  
45 19 changes to their home, work, social and leisure activities. Both pwMND and caregivers spoke  
46  
47 20 about the effort involved in either living with MND or looking after someone with MND.  
48  
49 21 This sometimes affected thoughts and mood negatively including feelings of frustration,  
50  
51 22 anxiety, tiredness or strain/burden. For example, C03, a caregiver, recalled being upset and  
52  
53 23 needing someone to talk to due to exhaustion from physically moving her spouse; “I used to  
54  
55 24 get so tired that sometimes when he had gone to bed in the evening I did just feel like  
56  
57 25 standing there crying.”  
58  
59  
60

1  
2  
3 1  
4  
5 2 (4) Feeling unsupported by professionals or the care system  
6  
7

8 3 Participants reported feeling distressed when healthcare professionals or the care system did  
9  
10 4 not support their needs. *Infrequent or inefficient care provision* left people feeling abandoned  
11  
12  
13 5 and left on their own to deal with MND.  
14

15 6  
16  
17 7 “I felt completely unsupported by the neurologist or the health service, we  
18  
19 8 were really just left on our own, completely in the dark as to what was gonna  
20  
21 9 happen... So, it was a very, very distressing time.” (Person with MND, P14)  
22  
23  
24  
25  
26

27 11 Poor coordination between different professionals/organizations, difficulty accessing  
28  
29 12 equipment and financial benefits also triggered feelings of frustration, injustice and being ‘let  
30  
31 13 down’ by the system.  
32  
33  
34  
35

36 15 *Poor or insensitive communication from healthcare professionals* added to emotional  
37  
38 16 distress. In particular, participants described upset as a consequence of a lack of empathy  
39  
40 17 from professionals, or insensitive or unsupportive presentation of care.  
41  
42  
43  
44

45 19 “Our life was shattered in 2 minutes. And I felt that was cruel, very very cruel  
46  
47 20 [pause]. There should be a way of discussing it with you and saying “well  
48  
49 21 look, you have such and such a condition, but hey, this is what we can do.”  
50  
51  
52 22 Not just you’ve got this and throw you out, and so we had to find our own way  
53  
54 23 round this problem.” (Caregiver, C01)  
55  
56  
57  
58  
59  
60

1  
2  
3 1 [Insert Fig. 2 here]  
4  
5  
6

7 2 **Strategies used to improve emotional wellbeing**  
8

9 3 Participants described strategies they used to improve emotional wellbeing (themes are  
10 4 numbered; *subthemes in italics*).  
11  
12  
13  
14  
15

16 6 (1) Finding hope and positivity  
17

18 7 Despite the many losses, participants actively found ways to introduce hope and positivity.  
19

20 8 For many people, acceptance of MND was a gradual, learned process and even once there  
21 9 was acceptance, an attitude of not giving up on life was important for coping (*acceptance and*  
22 10 *not giving up*).  
23  
24  
25  
26  
27

28 11 “I always wanna think I’ve got options, got somewhere to go because think at  
29 12 the point where you think well I’ve got nowhere left to go with this, that’s  
30 13 when you may sort of deteriorate and let it get the best of you. But I think if  
31 14 you if you say right well I’m going to, you know, there’s this trial, this might  
32 15 happen, I’ll go and see a physio... and just see if that helps me.” (Person with  
33 16 MND, P18)  
34  
35  
36  
37  
38  
39  
40  
41  
42  
43  
44

45 18 For some, not giving up included hoping for a cure or trying alternative therapies. For others,  
46 19 not giving up included finding solutions to make life easier, and not letting MND define them  
47 20 as they continued normal and valued activities. This strategy was endorsed mainly by  
48 21 pwMND.  
49  
50  
51  
52  
53  
54

55 22 “not giving up, not allowing it to put you away in a corner somewhere,  
56 23 waiting for the inevitable... not allowing that to define what you do with  
57 24 whatever time you have left.” (Person with MND, P06)  
58  
59  
60

1  
2  
3 1  
4  
5 2 Despite severe losses of function, many participants continued *doing activities that they*  
6  
7 *enjoyed and that were meaningful*. Planning ahead and having things to look forward to in  
8 3  
9 the immediate future added to feelings of hope.  
10 4  
11  
12 5

13  
14 6 “Key thing is to have lots of little goals, lots of little hopes of things to do,  
15  
16 normalities, weekends away, holidays but not in the far future. Everything’s in  
17 7  
18 a couple of weeks, 2-3 weeks, something to look forward to... it keeps the  
19 8  
20 mind occupied to know that there is something coming up.” (Person with  
21 9  
22 MND, P10)  
23 10  
24  
25  
26 11

27  
28 12 Most participants tried to *focus on the positive aspects of life*. This strategy became difficult  
29  
30 in the context of increasing loss, but participants still stressed that it was important.  
31 13  
32  
33 14

34  
35 15  
36  
37 16 “I’m very much sort of an optimist. You can’t...you know, because it’s  
38  
39 horrible we know that. But we just make [name of pwMND] as comfortable as  
40 17  
41 possible. You’ve got to be positive, otherwise you just sink and go under.”  
42 18  
43 (Caregiver, C07)  
44 19  
45  
46 20

47  
48 21 To stay positive and deal with negative emotions, participants tried to reframe difficult  
49  
50 situations by focusing on what they still can do, using humour, feeling grateful for symptoms  
51 22  
52 they did not have or feeling lucky because of their circumstances or because of the support  
53 23  
54 they received.  
55 24  
56  
57 25  
58  
59  
60

1  
2  
3 1 (2) Exerting some control  
4  
5

6 2 When MND took some control away, participants found other ways to exert control over  
7  
8 3 their lives. Although a sense of control was important for most participants, they exerted this  
9  
10 4 control in very different ways. One way was by *focusing on the present moment* and making  
11  
12 5 the most of what they could currently do. This strategy was adopted mainly by pwMND; it  
13  
14 6 stopped them from worrying about the future or feeling sad for what they could no longer do,  
15  
16 7 and instead had a more positive impact on emotions.  
17  
18  
19  
20  
21

22 9 “I realised there’s absolutely no point in dwelling on the past because there’s  
23  
24 10 absolutely nothing I can do to get that back. So, it’s waste of energy and  
25  
26 11 there’s no point in worrying about the future because there’s absolutely  
27  
28 12 nothing I can do about it. So, what I kind of taught myself to do is try to live in  
29  
30 13 here and now because I do have some control over that.” (Person with MND,  
31  
32 14 P04)  
33  
34  
35  
36  
37  
38  
39  
40  
41  
42  
43  
44  
45  
46  
47  
48  
49

50 16 Some participants described how it was helpful to exert *control over decisions about their*  
51  
52 17 *care*, organizing or planning care and taking a more active problem-solving approach. This  
53  
54 18 gave people a sense of empowerment when they would otherwise be struggling to cope, and  
55  
56 19 also helped people hold onto their independence or identity despite the loss.  
57  
58  
59  
60

61 21 “I hate the fact that I can’t talk. Although I can talk, but it’s a bit drained and  
62  
63 22 doesn’t sound like me. But I’ve done voice banking and I think you’ve got to  
64  
65 23 be a step ahead.” (Person with MND, P19)  
66  
67  
68  
69  
70

1  
2  
3 1 'they're [professionals] pretty good at picking up what might be the next thing  
4  
5 2 that's necessary or how tired I'm looking and dropping in a suggestion here  
6  
7  
8 3 and there about what you might change, what you might need next... in terms  
9  
10 4 of future proofing, so you're on top of a problem and not floundering about  
11  
12 5 solving it.' (Caregiver, C05)  
13  
14

15 6  
16  
17 7 However, some people exerted control by avoiding interactions or information that might  
18  
19 8 remind them of future symptoms or deterioration and associated negative emotions.  
20  
21  
22 9

23  
24 10 "Everyone's different, aren't they? And their MND is different. Some people  
25  
26 11 like to know the ins and out, but I don't know, I like to bury my head in the  
27  
28 12 sand. Because I know that I would sit and worry about it all the time. And I  
29  
30 13 don't want to." (Person with MND, P24)  
31  
32  
33

### 34 14 35 36 15 (3) Being kinder to oneself 37

38  
39 16 This strategy was mentioned by both pwMND and caregivers but for different kinds of tasks.  
40  
41 17 Living with MND was often described as overwhelming and participants expressed the need  
42  
43 18 for *taking a break* from MND. Caregivers spoke about the need to take a physical break from  
44  
45 19 MND care; while pwMND spoke about taking a break from MND by doing regular activities  
46  
47 20 and not thinking about MND.  
48  
49

50 21  
51  
52 22 "I'll have days where I deliberately avoid looking at anything and trying just  
53  
54 23 to have days or a couple of days where I don't think about MND." (Person  
55  
56 24 with MND, P18)  
57  
58  
59  
60 25



1  
2  
3 1 Some participants also expressed the need to give themselves *time and space to adjust to*  
4  
5 2 *changes* in symptoms. This was done by allowing themselves space to vent if they felt  
6  
7 3 overwhelmed, pacing their activities, lowering expectations, modifying how tasks were done,  
8  
9 4 or asking for help.

10  
11  
12 5  
13  
14 6 “Keep doing the things you enjoy, just lower your expectations and standards  
15  
16 7 so you achieve and don’t feel disappointed.” (Person with MND, P21)  
17  
18  
19 8

20  
21  
22 9 (4) Experiencing support from others

23  
24 10 *Emotional and practical support* from healthcare professionals, friends and family helped  
25  
26 11 pwMND and caregivers cope with any emotional distress. Emotional support included  
27  
28 12 being empathic, listening, being encouraging and positive. Participants also valued  
29  
30 13 support from other people with MND because they felt truly understood and less alone.  
31  
32  
33  
34 14

35  
36 15 “I had a confirmation diagnosis at [hospital] and then I had a phone call from  
37  
38 16 the [hospice] asking if I wanted to attend a kind of MND first contact group...  
39  
40 17 and it’s been a fantastic thing and I still go now. And that was really good,  
41  
42 18 really supportive.” (Person with MND, P19)  
43  
44  
45 19

46  
47 20 There were some differing views about the timing of offering support, especially just after  
48  
49 21 diagnosis. Some participants wanted access to information and support almost immediately,  
50  
51 22 however others needed some time to adjust before they accessed support.  
52  
53  
54 23

55  
56 24 *Supportive communication from healthcare professionals and reliability of care* helped  
57  
58 25 patients and families feel reassured and confident about their care, which led to positive  
59  
60

1 experiences and emotions. This included providing information based on the patient and  
2 families' readiness, communicating information in a sensitive and empathic manner, focusing  
3 on what can be done in terms of care and timely provision of care and equipment.

4  
5 "I would also mention my occupational therapist who has been brilliant at  
6 assessing my needs and getting in equipment quickly, usually just before they  
7 were needed. This has given me more confidence in the care and support I am  
8 given." (Person with MND, P22)

## 1 DISCUSSION

2 This study advances our understanding of what influences emotional distress and wellbeing  
3 among people with MND and their caregivers. Our findings come from a diverse sample,  
4 thereby highlighting key triggers of distress and coping strategies used by people with  
5 different abilities, symptoms and at different stages of having MND. PwMND and caregivers  
6 use coping strategies differently but still rely on similar concepts (hope, positivity, control,  
7 self-kindness, social support) to improve emotional wellbeing.

8  
9 Some of our findings are in line with previous MND research, such as the distress caused by  
10 loss of ability and threats to the future.(10, 26, 27, 38) Previous research has also identified  
11 distress caused through not receiving appropriate professional support.(6, 7, 10, 31, 39, 40)

12 We highlight the emotional distress triggered by multiple and constant changes brought about  
13 by disease progression and constantly 'playing catch up.' This is a new finding in terms of  
14 emotional distress for pwMND, but has been described in the literature around caregiver  
15 experience.(17, 41, 42) This is an important finding for intervention development, and we  
16 need to ensure that interventions are perceived as manageable, not burdensome.

17 In terms of emotional wellbeing, hope and control are particularly important for MND.(10,  
18 38, 40, 43, 44) Soundy and Condon (2015) have developed a model to show how concepts of  
19 hope and control can affect mental wellbeing in MND.(10) Hope and control can be difficult  
20 concepts to apply in MND where hope and control are constantly being threatened. Our  
21 findings highlight these complexities, and provide examples of how pwMND and caregivers  
22 use hope and control to maintain and improve wellbeing, despite this threat. For example, we  
23 found that many people use meaning-based coping strategies by either re-appraising difficult  
24 circumstances in a positive way or doing activities that were important and meaningful.

25 However, for some accepting their circumstances was difficult and hope meant adopting an

1 attitude of not giving up and not letting MND define them. Psychological interventions such  
2 as acceptance and commitment therapy can be useful and can foster meaning-based coping  
3 strategies.(45-47) However, there might be certain challenges in how interventions are  
4 presented to people who may find acceptance difficult with MND. Our findings also show  
5 how control is exerted differently in the face of loss, by focusing more on the present  
6 moment, or by making decisions about receiving information and care. This has implications  
7 for support services, especially in providing options for care, equipment and communication  
8 aids.(48) The importance of focusing on the present demonstrates the value of mindfulness-  
9 based approaches for psychological interventions. The differences in how people use control  
10 highlights the importance of having flexible support that is tailored to the individual's needs  
11 and coping preferences.(47) Another novel finding in relation to emotional wellbeing and  
12 MND is the importance of self-kindness and self-care. Self-compassion has been associated  
13 with adaptive coping strategies and wellbeing other chronic illnesses (49-51) and similar  
14 approaches may be useful for pwMND and their caregivers.

### 15 **Strengths and Limitations**

16 We aimed to recruit a diverse range of participants and succeeded in sampling people with  
17 different symptoms of varying severities, particularly people with difficulties speaking. We  
18 did not manage to recruit many people with mild cognitive impairment and could have  
19 benefitted from a more targeted sampling approach. Although we captured the experiences of  
20 newly diagnosed people and people who had MND for several years, we could not ascertain  
21 if we captured the experiences of people who were at the end stages. Conducting email  
22 interviews ensured we included the experiences of people with speech difficulties; however  
23 there were some methodological difficulties in using prompts and asking follow up questions.  
24 Despite these limitations, including the experiences of under-represented groups gives us

1  
2  
3 1 confidence in the application of these findings for people with different symptoms and at  
4  
5 2 different stages of MND.  
6  
7  
8

9 3 **Conclusion**

10  
11 4 We provide a broad understanding of what impacts emotional distress and wellbeing among  
12  
13 5 pwMND and their caregivers. Findings have important implications for psychological  
14  
15 6 interventions, services and professionals that support pwMND and their families. Any  
16  
17 7 communication and support provided for pwMND and their caregivers, needs to pay attention  
18  
19 8 to concepts of hope, control, and compassion, and how individuals may use these concepts  
20  
21 9 differently to cope with the emotional impact of MND.  
22  
23  
24  
25  
26  
27  
28  
29  
30  
31  
32  
33  
34  
35  
36  
37  
38  
39  
40  
41  
42  
43  
44  
45  
46  
47  
48  
49  
50  
51  
52  
53  
54  
55  
56  
57  
58  
59  
60

1  
2  
3 **1 Funding statement:**  
4

5  
6 2 This work was supported by the Motor Neurone Disease Association, UK under Grant  
7  
8 3 [Yardley/May17/891-792].  
9

10  
11  
12  
13  
14 **5 Competing interest statement:**  
15

16  
17 6 The authors report no conflict of interest.  
18  
19  
20 7

21  
22 **8 Data availability statement:**  
23

24 9 Anonymised interview transcripts can be made available upon reasonable request from the  
25  
26  
27 10 corresponding author Cathryn Pinto ([C.L.Pinto@soton.ac.uk](mailto:C.L.Pinto@soton.ac.uk)).  
28  
29

30 **11 Author contributions:**  
31

32 12 Cathryn Pinto: Main contributor to the design of the study, ethics application, recruitment and  
33  
34 13 data collection, data analysis, reporting and publication of findings.

35  
36  
37 14 Dr. Adam Geraghty: Involved in obtaining funding for the study, contributed to the study  
38  
39 15 design, supervised Cathryn during recruitment, data collection and data analysis, and  
40  
41 16 contributed to the reporting and publication of findings.

42  
43  
44 17 Prof. Lucy Yardley: Involved in obtaining funding for the study, contributed to the study  
45  
46 18 design and the reporting and publication of findings.

47  
48  
49 19 Dr. Laura Dennison: Involved in obtaining funding for the study, contributed to the study  
50  
51 20 design, supervised Cathryn during recruitment, data collection and data analysis, and  
52  
53 21 contributed to the reporting and publication of findings.  
54  
55  
56  
57  
58  
59  
60

## 1 References

1. Moore C, McDermott CJ, Shaw PJ. Clinical aspects of motor neurone disease. *Medicine*. 2008;36(12):640-5.
2. Clarke DM, McLeod JE, Smith GC, Trauer T, Kissane DW. A comparison of psychosocial and physical functioning in patients with motor neurone disease and metastatic cancer. *Journal of palliative care*. 2005;21(3):173-9.
3. Goldstein LH, Adamson M, Jeffrey L, Down K, Barby T, Wilson C, et al. The psychological impact of MND on patients and carers. *Journal of the Neurological Sciences*. 1998;160:S114-S21.
4. Hogg K, Goldstein LH, Leigh P. The psychological impact of motor neurone disease. *Psychological medicine*. 1994;24(3):625-32.
5. O'Brien MR, Whitehead B, Jack BA, Mitchell JD. From symptom onset to a diagnosis of amyotrophic lateral sclerosis/motor neuron disease (ALS/MND): experiences of people with ALS/MND and family carers—a qualitative study. *Amyotrophic lateral sclerosis*. 2011;12(2):97-104.
6. Pavey A, Allen-Collinson J, Pavey T. The lived experience of diagnosis delivery in motor neurone disease: a sociological-phenomenological study. *Sociological research online*. 2013;18(2):36-47.
7. O'Brien MR, Whitehead B, Jack BA, Mitchell JD. The need for support services for family carers of people with motor neurone disease (MND): views of current and former family caregivers a qualitative study. *Disability and rehabilitation*. 2012;34(3):247-56.
8. Averill AJ, Kasarskis EJ, Segerstrom SC. Psychological health in patients with amyotrophic lateral sclerosis. *Amyotrophic Lateral Sclerosis*. 2007;8(4):243-54.
9. McLeod JE, Clarke DM. A review of psychosocial aspects of motor neurone disease. *Journal of the neurological sciences*. 2007;258(1-2):4-10.
10. Soundy A, Condon N. Patients experiences of maintaining mental well-being and hope within motor neuron disease: a thematic synthesis. *Frontiers in psychology*. 2015;6:606.
11. Goldstein LH, Leigh PN. Motor neurone disease: a review of its emotional and cognitive consequences for patients and its impact on carers. *British Journal of Health Psychology*. 1999;4(3):193-208.
12. Pagnini F. Psychological wellbeing and quality of life in amyotrophic lateral sclerosis: a review. *International Journal of Psychology*. 2013;48(3):194-205.
13. Rabkin JG, Albert SM, Rowland LP, Mitsumoto H. How common is depression among ALS caregivers? A longitudinal study. *Amyotrophic Lateral Sclerosis*. 2009;10(5-6):448-55.
14. Cox DL. Perspectives of motor neurone disease. *Clinical rehabilitation*. 1992;6(4):333-9.
15. Brown JB. User, carer and professional experiences of care in motor neurone disease. *Primary Health Care Research & Development*. 2003;4(3):207-17.
16. Olsson Ozanne AG, Strang S, Persson LI. Quality of life, anxiety and depression in ALS patients and their next of kin. *Journal of clinical nursing*. 2011;20(1-2):283-91.
17. Galvin M, Corr B, Madden C, Mays I, McQuillan R, Timonen V, et al. Caregiving in ALS—a mixed methods approach to the study of burden. *BMC palliative care*. 2016;15(1):81.
18. Goldstein L, Atkins L, Landau S, Brown R, Leigh P. Longitudinal predictors of psychological distress and self-esteem in people with ALS. *Neurology*. 2006;67(9):1652-8.
19. de Wit J, Bakker LA, van Groenestijn AC, van den Berg LH, Schröder CD, Visser-Meily JMA, et al. Caregiver burden in amyotrophic lateral sclerosis: A systematic review. *Palliat Med*. 2018;32(1):231-45.

- 1 20. Larsson BJ, Nordin K, Nygren I. Coping with amyotrophic lateral sclerosis; from  
2 diagnosis and during disease progression. *Journal of the neurological sciences*.  
3 2016;361:235-42.
- 4 21. Matuz T, Birbaumer N, Hautzinger M, Kübler A. Coping with amyotrophic lateral  
5 sclerosis: an integrative view. *Journal of Neurology, Neurosurgery & Psychiatry*.  
6 2010;81(8):893-8.
- 7 22. Matuz T, Birbaumer N, Hautzinger M, Kübler A. Psychosocial adjustment to ALS: a  
8 longitudinal study. *Frontiers in psychology*. 2015;6:1197.
- 9 23. Goldstein L, Atkins L, Leigh P. Correlates of quality of life in people with motor  
10 neuron disease (MND). *Amyotrophic Lateral Sclerosis and Other Motor Neuron Disorders*.  
11 2002;3(3):123-9.
- 12 24. Bolmsjö I. Existential issues in palliative care: interviews of patients with  
13 amyotrophic lateral sclerosis. *Journal of palliative medicine*. 2001;4(4):499-505.
- 14 25. Foley G, O'Mahony P, Hardiman O. Perceptions of quality of life in people with  
15 ALS: effects of coping and health care. *Amyotrophic lateral sclerosis*. 2007;8(3):164-9.
- 16 26. Mistry K, Simpson J. Exploring the transitional process from receiving a diagnosis to  
17 living with motor neurone disease. *Psychology & health*. 2013;28(8):939-53.
- 18 27. Sakellariou D, Boniface G, Brown P. Experiences of living with motor neurone  
19 disease: a review of qualitative research. *Disability and rehabilitation*. 2013;35(21):1765-73.
- 20 28. Fisher P, Dodd R, Barrow E, Makin S, Cherry MG. Predictors of distress in  
21 amyotrophic lateral sclerosis: A systematic review. *Cogent Psychology*. 2019;6(1):1608031.
- 22 29. King SJ, Duke MM, O'Connor BA. Living with amyotrophic lateral sclerosis/motor  
23 neurone disease (ALS/MND): decision-making about 'ongoing change and adaptation'.  
24 *Journal of clinical nursing*. 2009;18(5):745-54.
- 25 30. Locock L, Mazanderani F, Powell J. Metaphoric language and the articulation of  
26 emotions by people affected by motor neurone disease. *Chronic illness*. 2012;8(3):201-13.
- 27 31. Whitehead B, O'Brien MR, Jack BA, Mitchell D. Experiences of dying, death and  
28 bereavement in motor neurone disease: a qualitative study. *Palliative Medicine*.  
29 2012;26(4):368-78.
- 30 32. Gould RL, Coulson MC, Brown RG, Goldstein LH, Al-Chalabi A, Howard RJ.  
31 Psychotherapy and pharmacotherapy interventions to reduce distress or improve well-being  
32 in people with amyotrophic lateral sclerosis: A systematic review. *Amyotrophic Lateral*  
33 *Sclerosis and Frontotemporal Degeneration*. 2015;16(5-6):293-302.
- 34 33. Zarotti N, Mayberry E, Ovaska-Stafford N, Eccles F, Simpson J. Psychological  
35 interventions for people with motor neuron disease: a scoping review. *Amyotroph Lateral*  
36 *Scler Frontotemporal Degener*. 2021;22(1-2):1-11.
- 37 34. Tong A, Sainsbury P, Craig J. Consolidated criteria for reporting qualitative research  
38 (COREQ): a 32-item checklist for interviews and focus groups. *International journal for*  
39 *quality in health care*. 2007;19(6):349-57.
- 40 35. Braun V, Clarke V. Using thematic analysis in psychology. *Qualitative research in*  
41 *psychology*. 2006;3(2):77-101.
- 42 36. Braun V, Clarke V. Reflecting on reflexive thematic analysis. *Qualitative Research in*  
43 *Sport, Exercise and Health*. 2019;11(4):589-97.
- 44 37. Jenkinson C, Fitzpatrick R. Reduced item set for the amyotrophic lateral sclerosis  
45 assessment questionnaire: development and validation of the ALSAQ-5. *Journal of*  
46 *Neurology, Neurosurgery & Psychiatry*. 2001;70(1):70-3.
- 47 38. Foley G, Timonen V, Hardiman O. Exerting control and adapting to loss in  
48 amyotrophic lateral sclerosis. *Social Science & Medicine*. 2014;101:113-9.



- 1 39. Hugel H, Grundy N, Rigby S, Young CA. How does current care practice influence  
2 the experience of a new diagnosis of motor neuron disease? A qualitative study of current  
3 guidelines-based practice. *Amyotrophic lateral sclerosis*. 2006;7(3):161-6.
- 4 40. Holkham L, Soundy A. The experience of informal caregivers of patients with motor  
5 neurone disease: a thematic synthesis. *Palliative & supportive care*. 2018;16(4):487-96.
- 6 41. Oyeboode JR, Smith H-J, Morrison K. The personal experience of partners of  
7 individuals with motor neuron disease. *Amyotrophic Lateral Sclerosis and Frontotemporal  
8 Degeneration*. 2013;14(1):39-43.
- 9 42. Aoun SM, Bentley B, Funk L, Toye C, Grande G, Stajduhar KJ. A 10-year literature  
10 review of family caregiving for motor neurone disease: moving from caregiver burden  
11 studies to palliative care interventions. *Palliative medicine*. 2013;27(5):437-46.
- 12 43. Fanos JH, Gelinas DF, Foster RS, Postone N, Miller RG. Hope in palliative care:  
13 from narcissism to self-transcendence in amyotrophic lateral sclerosis. *Journal of Palliative  
14 Medicine*. 2008;11(3):470-5.
- 15 44. Foley G, Timonen V, Hardiman O. Understanding psycho-social processes  
16 underpinning engagement with services in motor neurone disease: a qualitative study.  
17 *Palliative medicine*. 2014;28(4):318-25.
- 18 45. Graham CD, Simmons Z, Stuart SR, Rose MR. The potential of psychological  
19 interventions to improve quality of life and mood in muscle disorders. *Muscle & Nerve*.  
20 2015;52(1):131-6.
- 21 46. Kangas M, McDonald S. Is it time to act? The potential of acceptance and  
22 commitment therapy for psychological problems following acquired brain injury.  
23 *Neuropsychol*. 2011;21(2):250-76.
- 24 47. Weeks KR, Gould RL, Mcdermott C, Lynch J, Goldstein LH, Graham CD, et al.  
25 Needs and preferences for psychological interventions of people with motor neuron disease.  
26 *Amyotrophic lateral sclerosis and frontotemporal degeneration*. 2019;20(7-8):521-31.
- 27 48. Pavey A, Warren N, Allen-Collinson J. "It gives me my freedom": Technology and  
28 responding to bodily limitations in motor neuron disease. *Medical anthropology*.  
29 2015;34(5):442-55.
- 30 49. Sirois FM, Molnar DS, Hirsch JK. Self-compassion, stress, and coping in the context  
31 of chronic illness. *Self and Identity*. 2015;14(3):334-47.
- 32 50. Wren AA, Somers TJ, Wright MA, Goetz MC, Leary MR, Fras AM, et al. Self-  
33 compassion in patients with persistent musculoskeletal pain: relationship of self-compassion  
34 to adjustment to persistent pain. *Journal of pain and symptom management*. 2012;43(4):759-  
35 70.
- 36 51. Pinto-Gouveia J, Duarte C, Matos M, Fráguas S. The protective role of  
37 self-compassion in relation to psychopathology symptoms and quality of life in chronic and  
38 in cancer patients. *Clinical psychology & psychotherapy*. 2014;21(4):311-23.

39  
40  
41 Figure 1. Triggers of emotional distress

42 Figure 2. Strategies used to improve emotional wellbeing



Figure 1. Triggers of emotional distress

167x94mm (300 x 300 DPI)

1  
2  
3  
4  
5  
6  
7  
8  
9  
10  
11  
12  
13  
14  
15  
16  
17  
18  
19  
20  
21  
22  
23  
24  
25  
26  
27  
28  
29  
30  
31  
32  
33  
34  
35  
36  
37  
38  
39  
40  
41  
42  
43  
44  
45  
46  
47  
48  
49  
50  
51  
52  
53  
54  
55  
56  
57  
58  
59  
60



Figure 2. Strategies used to improve emotional wellbeing

427x236mm (96 x 96 DPI)

1  
2  
3  
4  
5  
6  
7  
8  
9  
10  
11  
12  
13  
14  
15  
16  
17  
18  
19  
20  
21  
22  
23  
24  
25  
26  
27  
28  
29  
30  
31  
32  
33  
34  
35  
36  
37  
38  
39  
40  
41  
42  
43  
44  
45  
46  
47  
48  
49  
50  
51  
52  
53  
54  
55  
56  
57  
58  
59  
60

## SUPPLEMENTARY FILE 1

### 2. Consolidated criteria for reporting qualitative studies (COREQ):

Tong A, Sainsbury P, Craig J. Consolidated criteria for reporting qualitative research (COREQ): a 32-item checklist for interviews and focus groups. *International Journal for Quality in Health Care*. 2007. Volume 19, Number 6: pp. 349 – 357

| No. Item                                       | Guide questions/description                                                                              | Reported on Page #                                                                                                                                                                                                                                   |
|------------------------------------------------|----------------------------------------------------------------------------------------------------------|------------------------------------------------------------------------------------------------------------------------------------------------------------------------------------------------------------------------------------------------------|
| <b>Domain 1: Research team and reflexivity</b> |                                                                                                          |                                                                                                                                                                                                                                                      |
| <i>Personal Characteristics</i>                |                                                                                                          |                                                                                                                                                                                                                                                      |
| 1. Interviewer/facilitator                     | Which author/s conducted the interview or focus group?                                                   | CP – Methods section, Pg 7                                                                                                                                                                                                                           |
| 2. Credentials                                 | What were the researcher's credentials? E.g. PhD, MD                                                     | PhD student – Methods section, Pg 8                                                                                                                                                                                                                  |
| 3. Occupation                                  | What was their occupation at the time of the study?                                                      | PhD student – Methods section, Pg 8                                                                                                                                                                                                                  |
| 4. Gender                                      | Was the researcher male or female?                                                                       | Female                                                                                                                                                                                                                                               |
| 5. Experience and training                     | What experience or training did the researcher have?                                                     | Methods section – Pg 7-8                                                                                                                                                                                                                             |
| <i>Relationship with participants</i>          |                                                                                                          |                                                                                                                                                                                                                                                      |
| 6. Relationship established                    | Was a relationship established prior to study commencement?                                              | No, Pg 6                                                                                                                                                                                                                                             |
| 7. Participant knowledge of the interviewer    | What did the participants know about the researcher? e.g. personal goals, reasons for doing the research | Participants knew that the researcher was a PhD student at the University of Southampton, doing her PhD on emotional distress and wellbeing in Motor Neurone Disease (MND). This information was described on the participant information sheets and |

|                                          |                                                                                                                                                             |                                                                                                                                                                                     |
|------------------------------------------|-------------------------------------------------------------------------------------------------------------------------------------------------------------|-------------------------------------------------------------------------------------------------------------------------------------------------------------------------------------|
|                                          |                                                                                                                                                             | study adverts. Pg 6                                                                                                                                                                 |
| 8. Interviewer characteristics           | What characteristics were reported about the interviewer/facilitator?<br>e.g. Bias, assumptions, reasons and interests in the research topic                | The interviewer did not have much prior knowledge of MND, but had previously worked with and interviewed people with Parkinson's disease and people receiving palliative care. Pg 8 |
| <b>Domain 2: study design</b>            |                                                                                                                                                             |                                                                                                                                                                                     |
| <i>Theoretical framework</i>             |                                                                                                                                                             |                                                                                                                                                                                     |
| 9. Methodological orientation and Theory | What methodological orientation was stated to underpin the study?<br>e.g. grounded theory, discourse analysis, ethnography, phenomenology, content analysis | The study used methods (in-depth semi-structured interviews and reflexive thematic analysis) in line with an interpretivist paradigm. Pg 6                                          |
| <i>Participant selection</i>             |                                                                                                                                                             |                                                                                                                                                                                     |
| 10. Sampling                             | How were participants selected?<br>e.g. purposive, convenience, consecutive, snowball                                                                       | Purposive sampling – Methods section, Pg 6                                                                                                                                          |
| 11. Method of approach                   | How were participants approached? e.g. face-to-face, telephone, mail, email                                                                                 | Methods section – Pg 6-7                                                                                                                                                            |
| 12. Sample size                          | How many participants were in the study?                                                                                                                    | Methods section – Pg 9                                                                                                                                                              |
| 13. Non-participation                    | How many people refused to participate or dropped out?<br>Reasons?                                                                                          | Participants contacted the researcher if they wanted to take part in an interview. No one dropped out. Pg 9                                                                         |
| <i>Setting</i>                           |                                                                                                                                                             |                                                                                                                                                                                     |
| 14. Setting of data collection           | Where was the data collected? e.g. home, clinic, workplace                                                                                                  | Methods section – Pg 7                                                                                                                                                              |
| 15. Presence of non-participants         | Was anyone else present besides the participants and researchers?                                                                                           | No (not reported because not present)                                                                                                                                               |
| 16. Description of sample                | What are the important characteristics of the sample? e.g. demographic data, date                                                                           | Methods section – Pgs 9-10                                                                                                                                                          |
| <i>Data collection</i>                   |                                                                                                                                                             |                                                                                                                                                                                     |

|                                        |                                                                               |                                                                                                                                                                                                            |
|----------------------------------------|-------------------------------------------------------------------------------|------------------------------------------------------------------------------------------------------------------------------------------------------------------------------------------------------------|
| 17. Interview guide                    | Were questions, prompts, guides provided by the authors? Was it pilot tested? | Methods section, Pg 7 and supplementary file 2                                                                                                                                                             |
| 18. Repeat interviews                  | Were repeat interviews carried out? If yes, how many?                         | N/A                                                                                                                                                                                                        |
| 19. Audio/visual recording             | Did the research use audio or visual recording to collect the data?           | Methods section – Pg 7                                                                                                                                                                                     |
| 20. Field notes                        | Were field notes made during and/or after the interview or focus group?       | Field notes were made after each interview. Pg 7                                                                                                                                                           |
| 21. Duration                           | What was the duration of the interviews or focus group?                       | Average duration reported – Methods section, Pg 9                                                                                                                                                          |
| 22. Data saturation                    | Was data saturation discussed?                                                | No. We were not aiming for theoretical data saturation, but rather to look at patterns of experience across participants with diverse characteristics. (not reported because not applicable to this study) |
| 23. Transcripts returned               | Were transcripts returned to participants for comment and/or correction?      | No (not reported because was not carried out)                                                                                                                                                              |
| <b>Domain 3: analysis and findings</b> |                                                                               |                                                                                                                                                                                                            |
| <i>Data analysis</i>                   |                                                                               |                                                                                                                                                                                                            |
| 24. Number of data coders              | How many data coders coded the data?                                          | One – Methods section, Pgs 7-8                                                                                                                                                                             |
| 25. Description of the coding tree     | Did authors provide a description of the coding tree?                         | N/A                                                                                                                                                                                                        |
| 26. Derivation of themes               | Were themes identified in advance or derived from the data?                   | Inductive thematic analysis – Methods section, Pg 7                                                                                                                                                        |
| 27. Software                           | What software, if applicable, was used to manage the data?                    | NVivo Pg 8                                                                                                                                                                                                 |
| 28. Participant checking               | Did participants provide feedback on the findings?                            | Not participant checking, but lay summary of findings was sent to all participants Pg 8                                                                                                                    |
| <i>Reporting</i>                       |                                                                               |                                                                                                                                                                                                            |

|                                  |                                                                                                                                 |                                                                                                         |
|----------------------------------|---------------------------------------------------------------------------------------------------------------------------------|---------------------------------------------------------------------------------------------------------|
| 29. Quotations presented         | Were participant quotations presented to illustrate the themes/findings? Was each quotation identified? e.g. participant number | Yes, Results section Pgs 9-21                                                                           |
| 30. Data and findings consistent | Was there consistency between the data presented and the findings?                                                              | Yes, illustrative quotations have been provided for each theme and sub-theme – Results section Pgs 9-21 |
| 31. Clarity of major themes      | Were major themes clearly presented in the findings?                                                                            | Results section and presented in Figures 1 & 2, Pgs 9-21                                                |
| 32. Clarity of minor themes      | Is there a description of diverse cases or discussion of minor themes?                                                          | Description of diverse cases embedded within the explanation of themes – Results section Pgs 9-21       |

## SUPPLEMENTARY FILE 2

### 1. Interview topic guide

- (1) Can you tell me about your experience with MND?
  - wherever the participant would like to start, could be about diagnosis or their experience now.
  - Have your thoughts and feelings changed since you were diagnosed or are they the same? (If different, in what way have they changed?)
- (2) What's it like to live with MND? Can you tell me a bit more about that?
  - What are your main concerns/worries/emotions you face on a day to day basis?
  - What are your thoughts and feelings about living with MND?
- (3) Can you tell me about how you manage MND on a daily basis? If you find yourself having emotional concerns or worries, do you have any ways of managing them?
- (4) Can you tell me about any support you feel you have? Or people/ things/ processes that have helped you?
- (5) (In addition to this support) Do you have any thoughts about what else might support you to cope with MND?



1  
2  
3  
4  
5  
6  
7  
8  
9  
10  
11  
12  
13  
14  
15  
16  
17  
18  
19  
20  
21  
22  
23  
24  
25  
26  
27  
28  
29  
30  
31  
32  
33  
34  
35  
36  
37  
38  
39  
40  
41  
42  
43  
44  
45  
46  
47  
48  
49  
50  
51  
52  
53  
54  
55  
56  
57  
58  
59  
60

- particularly additional support with any emotional concerns/worries that participants have previously mentioned.

For peer review only
