# Supplementary material for: Emotional distress and well-being among people with motor neurone disease (MND) and their family caregivers: a qualitative interview study
Source: PubMed Central journal article supplement (PMC8372816; doi:10.1136/bmjopen-2020-044724), 2021-08-16
Supplement: bmjopen-2020-044724supp001.pdf [file bmjopen-2020-044724supp001.pdf]

## SUPPLEMENTARY FILE 1

### 2. Consolidated criteria for reporting qualitative studies (COREQ):

Tong A, Sainsbury P, Craig J. Consolidated criteria for reporting qualitative research (COREQ): a 32-item checklist for interviews and focus groups. *International Journal for Quality in Health Care*. 2007. Volume 19, Number 6: pp. 349 – 357

| No. Item                                       | Guide questions/description                                                                              | Reported on Page #                                                                                                                                                                                                                                   |
|------------------------------------------------|----------------------------------------------------------------------------------------------------------|------------------------------------------------------------------------------------------------------------------------------------------------------------------------------------------------------------------------------------------------------|
| <b>Domain 1: Research team and reflexivity</b> |                                                                                                          |                                                                                                                                                                                                                                                      |
| <i>Personal Characteristics</i>                |                                                                                                          |                                                                                                                                                                                                                                                      |
| 1. Interviewer/facilitator                     | Which author/s conducted the interview or focus group?                                                   | CP – Methods section, Pg 7                                                                                                                                                                                                                           |
| 2. Credentials                                 | What were the researcher's credentials? E.g. PhD, MD                                                     | PhD student – Methods section, Pg 8                                                                                                                                                                                                                  |
| 3. Occupation                                  | What was their occupation at the time of the study?                                                      | PhD student – Methods section, Pg 8                                                                                                                                                                                                                  |
| 4. Gender                                      | Was the researcher male or female?                                                                       | Female                                                                                                                                                                                                                                               |
| 5. Experience and training                     | What experience or training did the researcher have?                                                     | Methods section – Pg 7-8                                                                                                                                                                                                                             |
| <i>Relationship with participants</i>          |                                                                                                          |                                                                                                                                                                                                                                                      |
| 6. Relationship established                    | Was a relationship established prior to study commencement?                                              | No, Pg 6                                                                                                                                                                                                                                             |
| 7. Participant knowledge of the interviewer    | What did the participants know about the researcher? e.g. personal goals, reasons for doing the research | Participants knew that the researcher was a PhD student at the University of Southampton, doing her PhD on emotional distress and wellbeing in Motor Neurone Disease (MND). This information was described on the participant information sheets and |

|                                          |                                                                                                                                                             |                                                                                                                                                                                     |
|------------------------------------------|-------------------------------------------------------------------------------------------------------------------------------------------------------------|-------------------------------------------------------------------------------------------------------------------------------------------------------------------------------------|
|                                          |                                                                                                                                                             | study adverts. Pg 6                                                                                                                                                                 |
| 8. Interviewer characteristics           | What characteristics were reported about the interviewer/facilitator?<br>e.g. Bias, assumptions, reasons and interests in the research topic                | The interviewer did not have much prior knowledge of MND, but had previously worked with and interviewed people with Parkinson's disease and people receiving palliative care. Pg 8 |
| <b>Domain 2: study design</b>            |                                                                                                                                                             |                                                                                                                                                                                     |
| <i>Theoretical framework</i>             |                                                                                                                                                             |                                                                                                                                                                                     |
| 9. Methodological orientation and Theory | What methodological orientation was stated to underpin the study?<br>e.g. grounded theory, discourse analysis, ethnography, phenomenology, content analysis | The study used methods (in-depth semi-structured interviews and reflexive thematic analysis) in line with an interpretivist paradigm. Pg 6                                          |
| <i>Participant selection</i>             |                                                                                                                                                             |                                                                                                                                                                                     |
| 10. Sampling                             | How were participants selected?<br>e.g. purposive, convenience, consecutive, snowball                                                                       | Purposive sampling – Methods section, Pg 6                                                                                                                                          |
| 11. Method of approach                   | How were participants approached? e.g. face-to-face, telephone, mail, email                                                                                 | Methods section – Pg 6-7                                                                                                                                                            |
| 12. Sample size                          | How many participants were in the study?                                                                                                                    | Methods section – Pg 9                                                                                                                                                              |
| 13. Non-participation                    | How many people refused to participate or dropped out?<br>Reasons?                                                                                          | Participants contacted the researcher if they wanted to take part in an interview. No one dropped out. Pg 9                                                                         |
| <i>Setting</i>                           |                                                                                                                                                             |                                                                                                                                                                                     |
| 14. Setting of data collection           | Where was the data collected? e.g. home, clinic, workplace                                                                                                  | Methods section – Pg 7                                                                                                                                                              |
| 15. Presence of non-participants         | Was anyone else present besides the participants and researchers?                                                                                           | No (not reported because not present)                                                                                                                                               |
| 16. Description of sample                | What are the important characteristics of the sample? e.g. demographic data, date                                                                           | Methods section – Pgs 9-10                                                                                                                                                          |
| <i>Data collection</i>                   |                                                                                                                                                             |                                                                                                                                                                                     |

|                                        |                                                                               |                                                                                                                                                                                                            |
|----------------------------------------|-------------------------------------------------------------------------------|------------------------------------------------------------------------------------------------------------------------------------------------------------------------------------------------------------|
| 17. Interview guide                    | Were questions, prompts, guides provided by the authors? Was it pilot tested? | Methods section, Pg 7 and supplementary file 2                                                                                                                                                             |
| 18. Repeat interviews                  | Were repeat interviews carried out? If yes, how many?                         | N/A                                                                                                                                                                                                        |
| 19. Audio/visual recording             | Did the research use audio or visual recording to collect the data?           | Methods section – Pg 7                                                                                                                                                                                     |
| 20. Field notes                        | Were field notes made during and/or after the interview or focus group?       | Field notes were made after each interview. Pg 7                                                                                                                                                           |
| 21. Duration                           | What was the duration of the interviews or focus group?                       | Average duration reported – Methods section, Pg 9                                                                                                                                                          |
| 22. Data saturation                    | Was data saturation discussed?                                                | No. We were not aiming for theoretical data saturation, but rather to look at patterns of experience across participants with diverse characteristics. (not reported because not applicable to this study) |
| 23. Transcripts returned               | Were transcripts returned to participants for comment and/or correction?      | No (not reported because was not carried out)                                                                                                                                                              |
| <b>Domain 3: analysis and findings</b> |                                                                               |                                                                                                                                                                                                            |
| <i>Data analysis</i>                   |                                                                               |                                                                                                                                                                                                            |
| 24. Number of data coders              | How many data coders coded the data?                                          | One – Methods section, Pgs 7-8                                                                                                                                                                             |
| 25. Description of the coding tree     | Did authors provide a description of the coding tree?                         | N/A                                                                                                                                                                                                        |
| 26. Derivation of themes               | Were themes identified in advance or derived from the data?                   | Inductive thematic analysis – Methods section, Pg 7                                                                                                                                                        |
| 27. Software                           | What software, if applicable, was used to manage the data?                    | NVivo Pg 8                                                                                                                                                                                                 |
| 28. Participant checking               | Did participants provide feedback on the findings?                            | Not participant checking, but lay summary of findings was sent to all participants Pg 8                                                                                                                    |
| <i>Reporting</i>                       |                                                                               |                                                                                                                                                                                                            |

|                                  |                                                                                                                                 |                                                                                                         |
|----------------------------------|---------------------------------------------------------------------------------------------------------------------------------|---------------------------------------------------------------------------------------------------------|
| 29. Quotations presented         | Were participant quotations presented to illustrate the themes/findings? Was each quotation identified? e.g. participant number | Yes, Results section Pgs 9-21                                                                           |
| 30. Data and findings consistent | Was there consistency between the data presented and the findings?                                                              | Yes, illustrative quotations have been provided for each theme and sub-theme – Results section Pgs 9-21 |
| 31. Clarity of major themes      | Were major themes clearly presented in the findings?                                                                            | Results section and presented in Figures 1 & 2, Pgs 9-21                                                |
| 32. Clarity of minor themes      | Is there a description of diverse cases or discussion of minor themes?                                                          | Description of diverse cases embedded within the explanation of themes – Results section Pgs 9-21       |
