# Supplementary material for: Emotional distress and well-being among people with motor neurone disease (MND) and their family caregivers: a qualitative interview study
Source: PubMed Central journal article supplement (PMC8372816; doi:10.1136/bmjopen-2020-044724), 2021-08-16
Supplement: bmjopen-2020-044724supp002.pdf [file bmjopen-2020-044724supp002.pdf]

## SUPPLEMENTARY FILE 2

### 1. Interview topic guide

- (1) Can you tell me about your experience with MND?
  - wherever the participant would like to start, could be about diagnosis or their experience now.
  - Have your thoughts and feelings changed since you were diagnosed or are they the same? (If different, in what way have they changed?)
  
- (2) What's it like to live with MND? Can you tell me a bit more about that?
  - What are your main concerns/worries/emotions you face on a day to day basis?
  - What are your thoughts and feelings about living with MND?
  
- (3) Can you tell me about how you manage MND on a daily basis? If you find yourself having emotional concerns or worries, do you have any ways of managing them?
  
- (4) Can you tell me about any support you feel you have? Or people/ things/ processes that have helped you?
  
- (5) (In addition to this support) Do you have any thoughts about what else might support you to cope with MND?

- particularly additional support with any emotional concerns/worries that participants have previously mentioned.
